# Supplementary material for: Analysis of Non-volatile Component Differences and Metabolic Pathways in Various Forms of Dracaena cochinchinensis Resin-Containing drugs Using Untargeted Metabolomics and Molecular Networking
Source: Research Square preprint supplement (doi:10.21203/rs.3.rs-7120702/v1), 2025-07-30
Supplement: Supplementary file 1 [file 1775dfe80dc022fc877e4ffe.docx]

Supplementary Material

**Supplementary Figure 1.** Total ion current diagram in different forms of resin-containing hurbs in Dracaenal materials containing lipids A:LZ B:MZ C:P

**Supplementary Figure 2.** Molecular network of resin-containing drugs in Dracaena in positive ion mode.

**Supplementary Figure 3.** Molecular network of resin-containing drugs in Dracaena in negative ion mode.

**Supplementary Figure 4.** Classification of compounds

**Supplementary Figure 5.** Clustering of differential metabolite abundance in LZ and MZ groups

**Supplementary Figure 6.** Cluster of differential metabolite abundance in MZ group and P groups

**Supplementary Figure 7.** Clustering of differential metabolite abundance in LZ group and P groups

**Supplementary Table S1.** Specific information about the compound detected by UHPLC-Q-TOF-MS/MS analysis of different fermented grains.

**Supplementary Table S2** Parameters of OPLS-DA Models

**Supplementary Table S3** Metabolites are highly expressed in LZ in differentiated compounds

**Supplementary Table S4** Metabolites are highly expressed in MZ in differentiated compounds

**Supplementary Table S5** Metabolites are highly expressed in P in differentiated compounds

**Supplementary Figure 1.** Total ion current diagram in different forms of resin-containing hurbs in Dracaenal materials containing lipids A:LZ B:MZ C:P


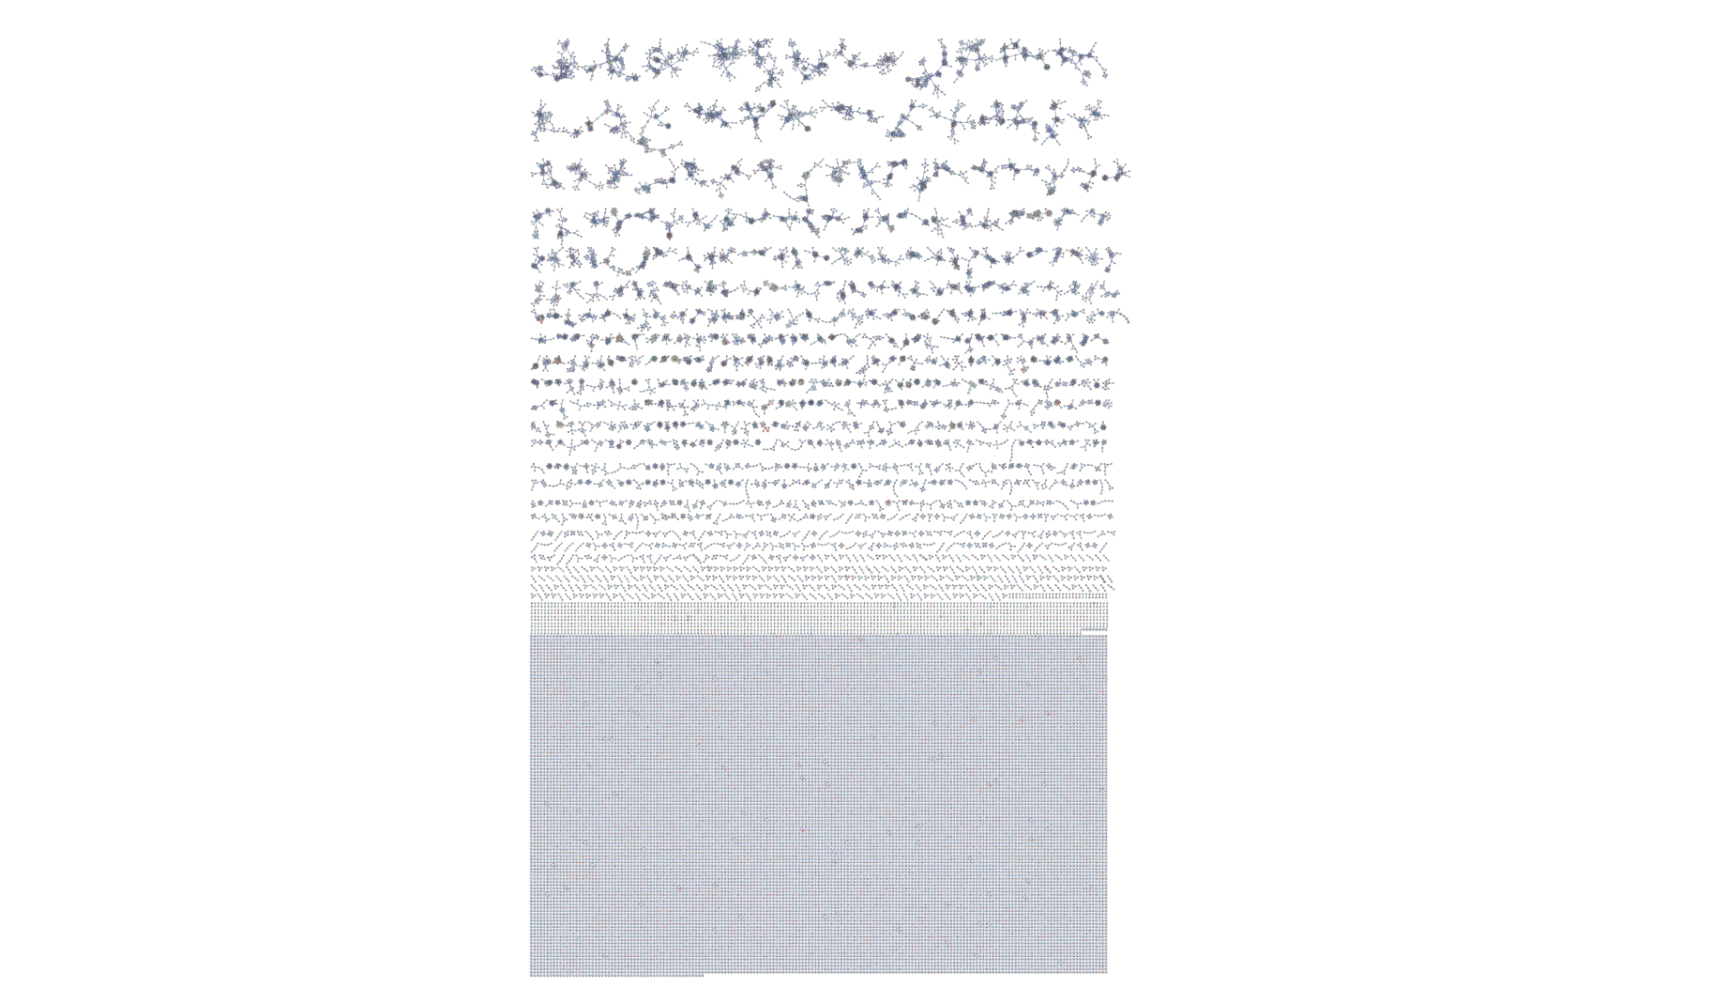


**Supplementary Figure 2.** Molecular network of resin-containing drugs in Dracaena in positive ion mode.


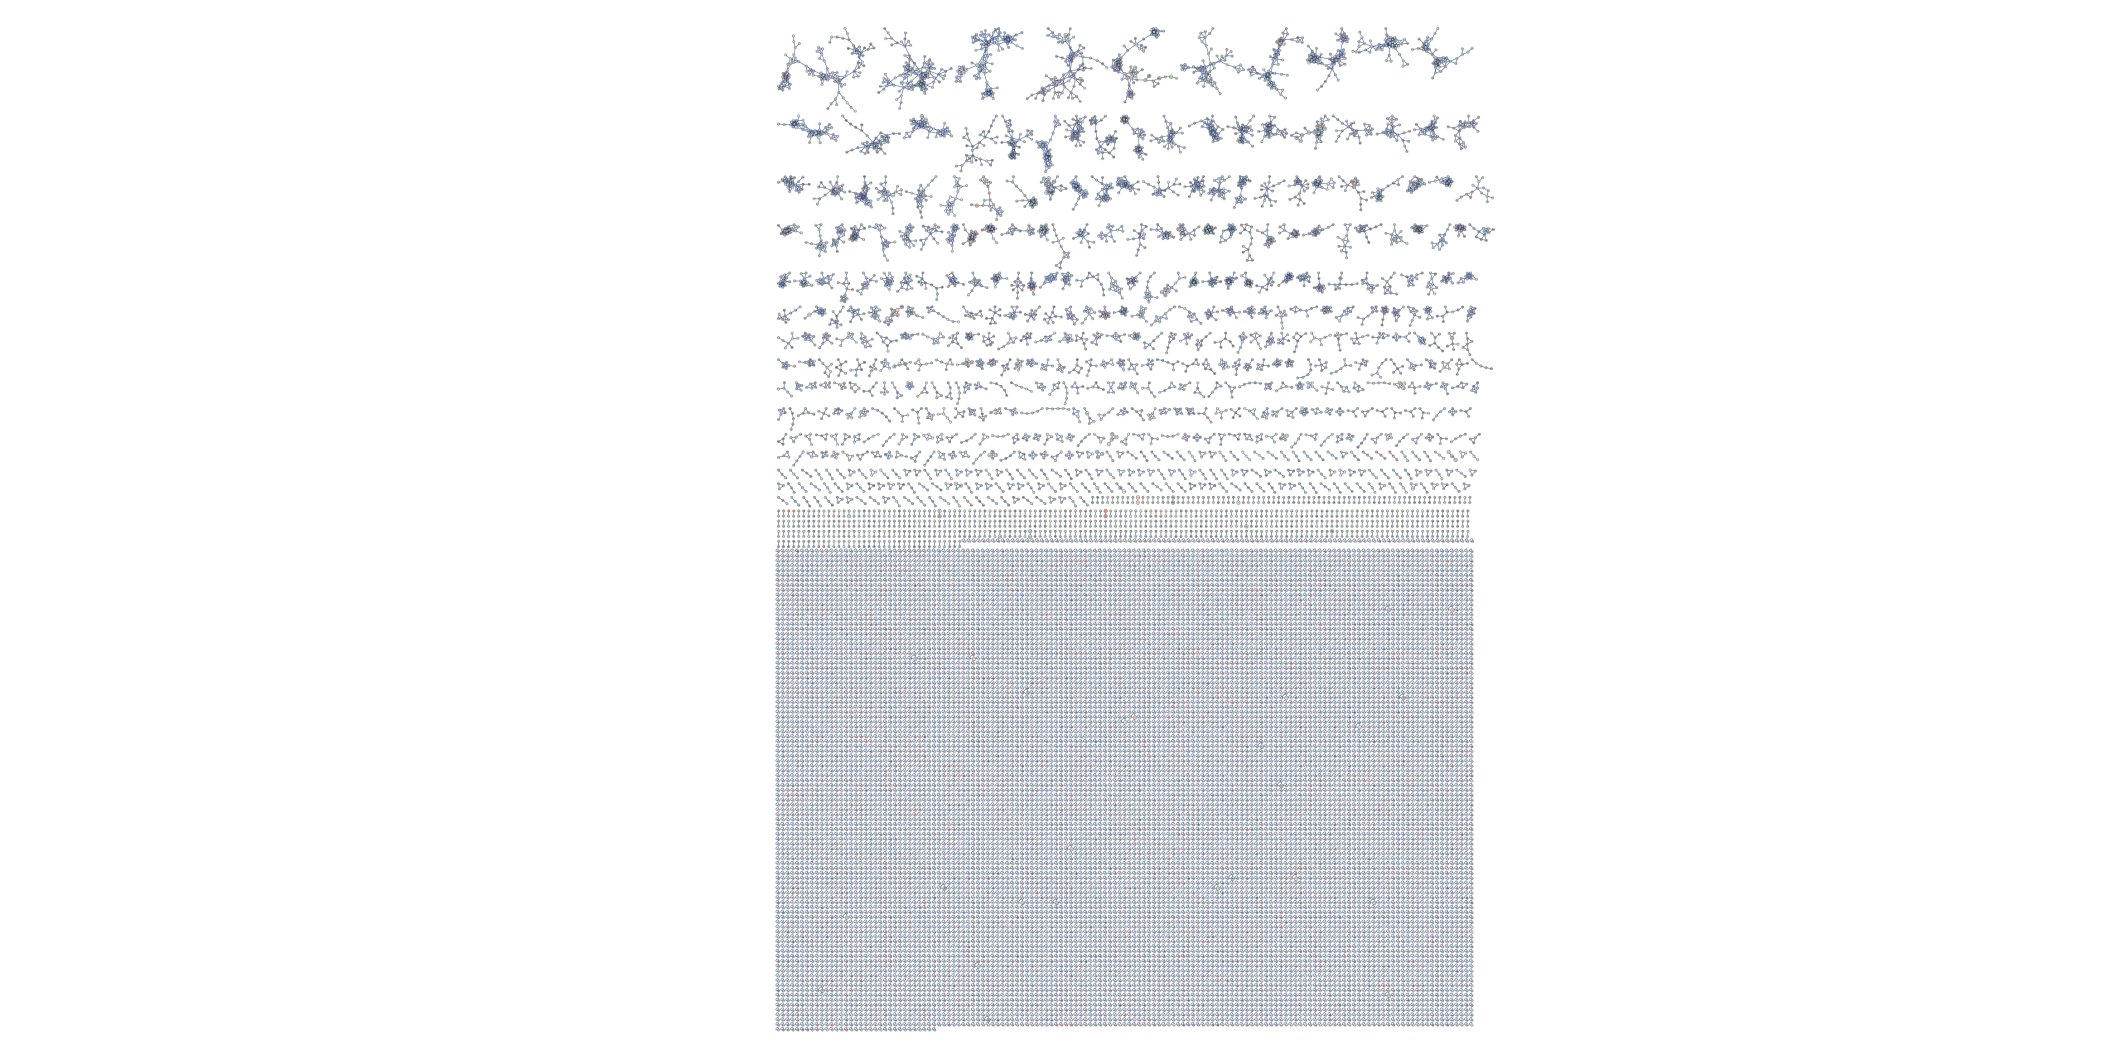


**Supplementary Figure 3.** Molecular network of resin-containing drugs in Dracaena in negative ion mode.


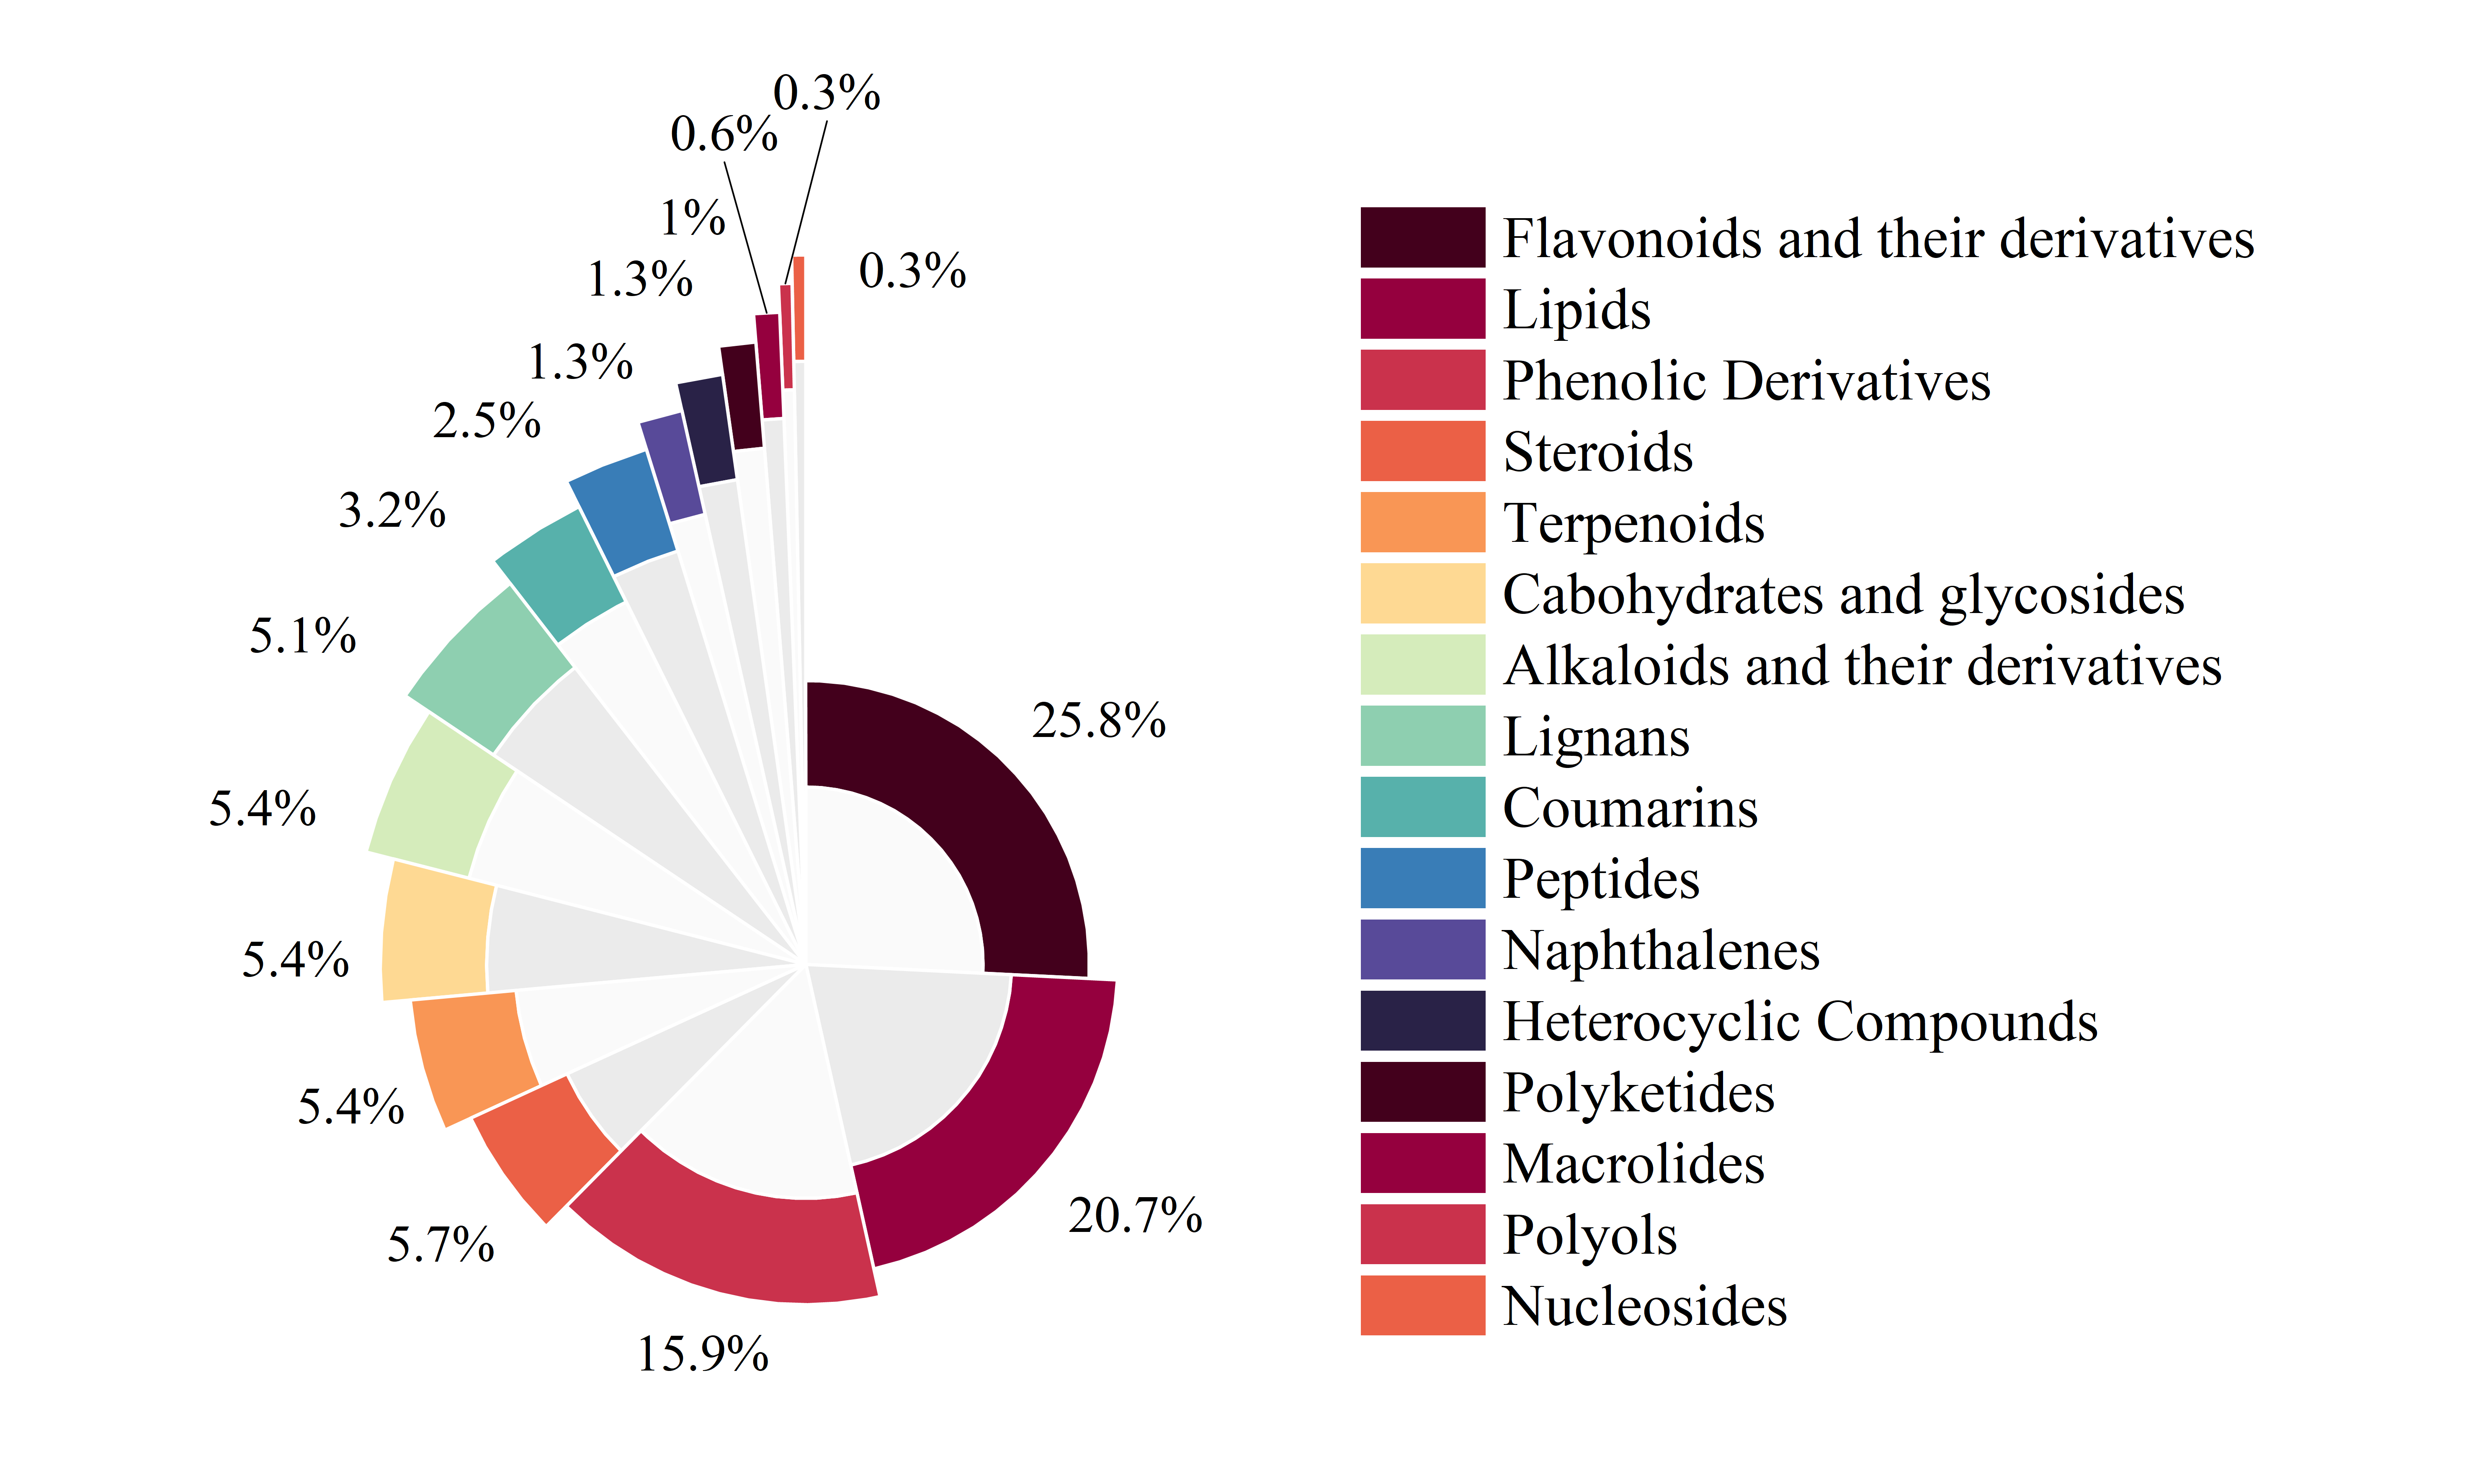


**Supplementary Figure 4.** Classification of compounds


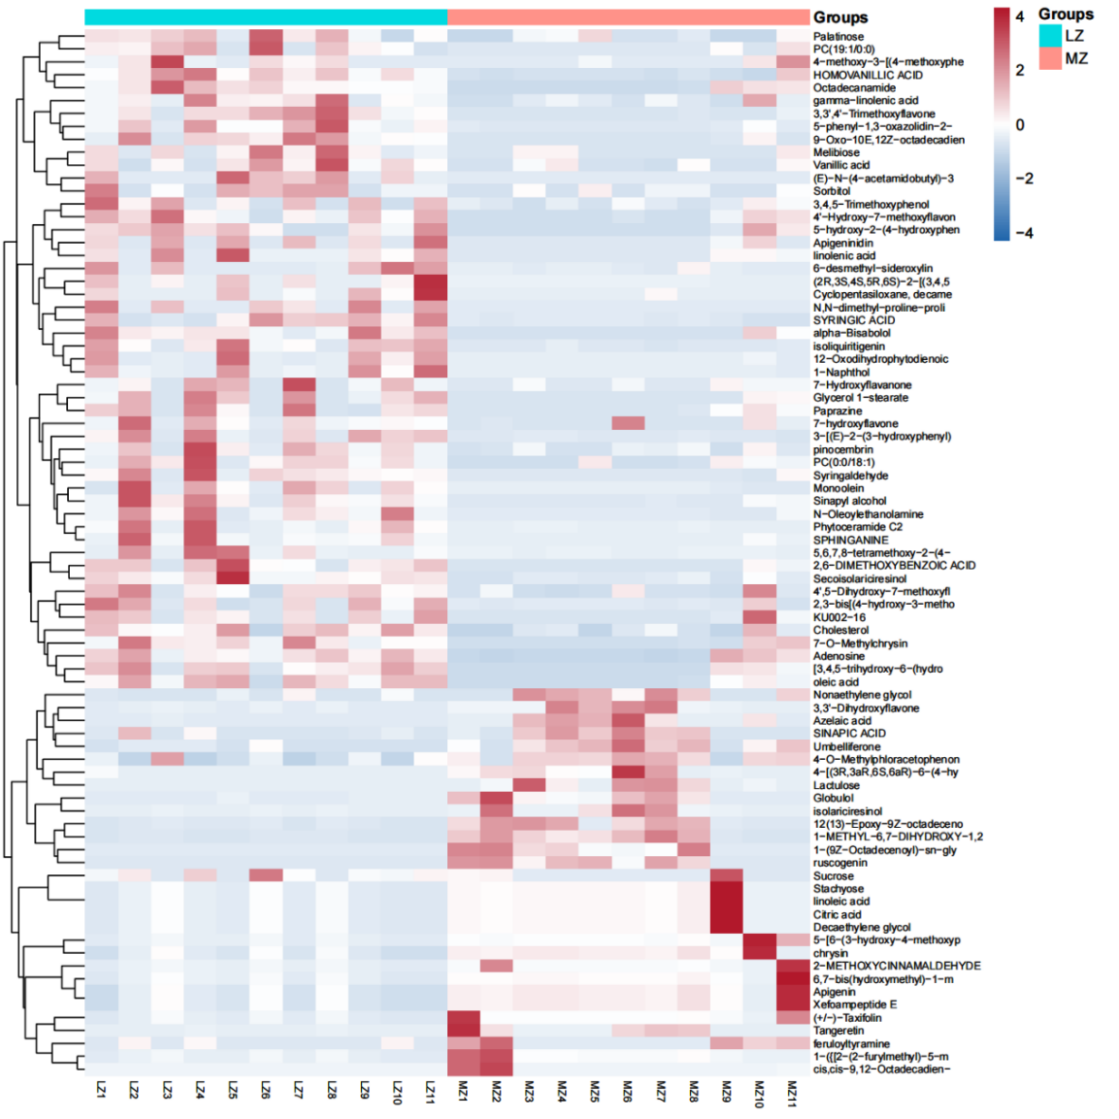


**Supplementary Figure 5.** Clustering of differential metabolite abundance in LZ and MZ groups


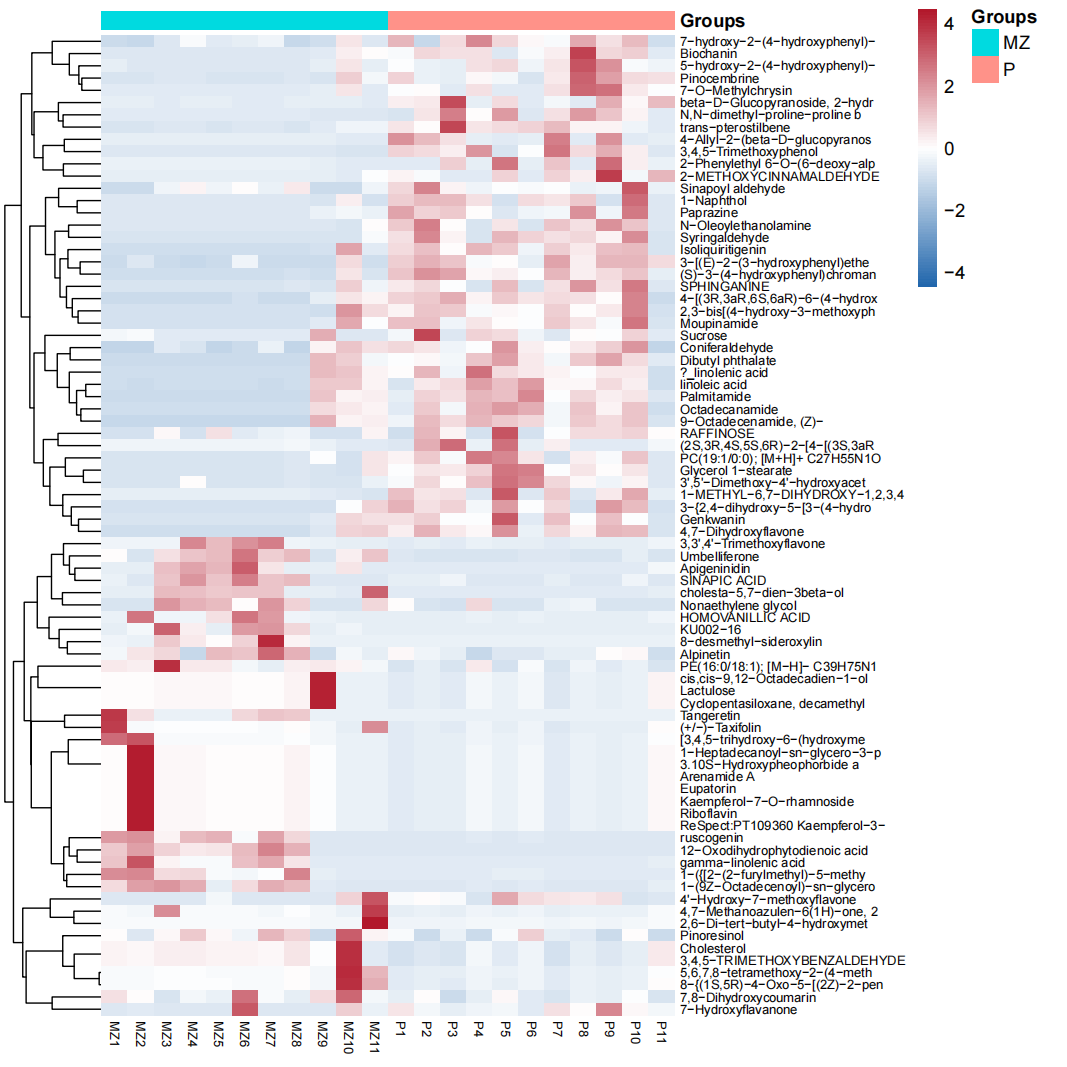


**Supplementary Figure 6.** Cluster of differential metabolite abundance in MZ group and P groups


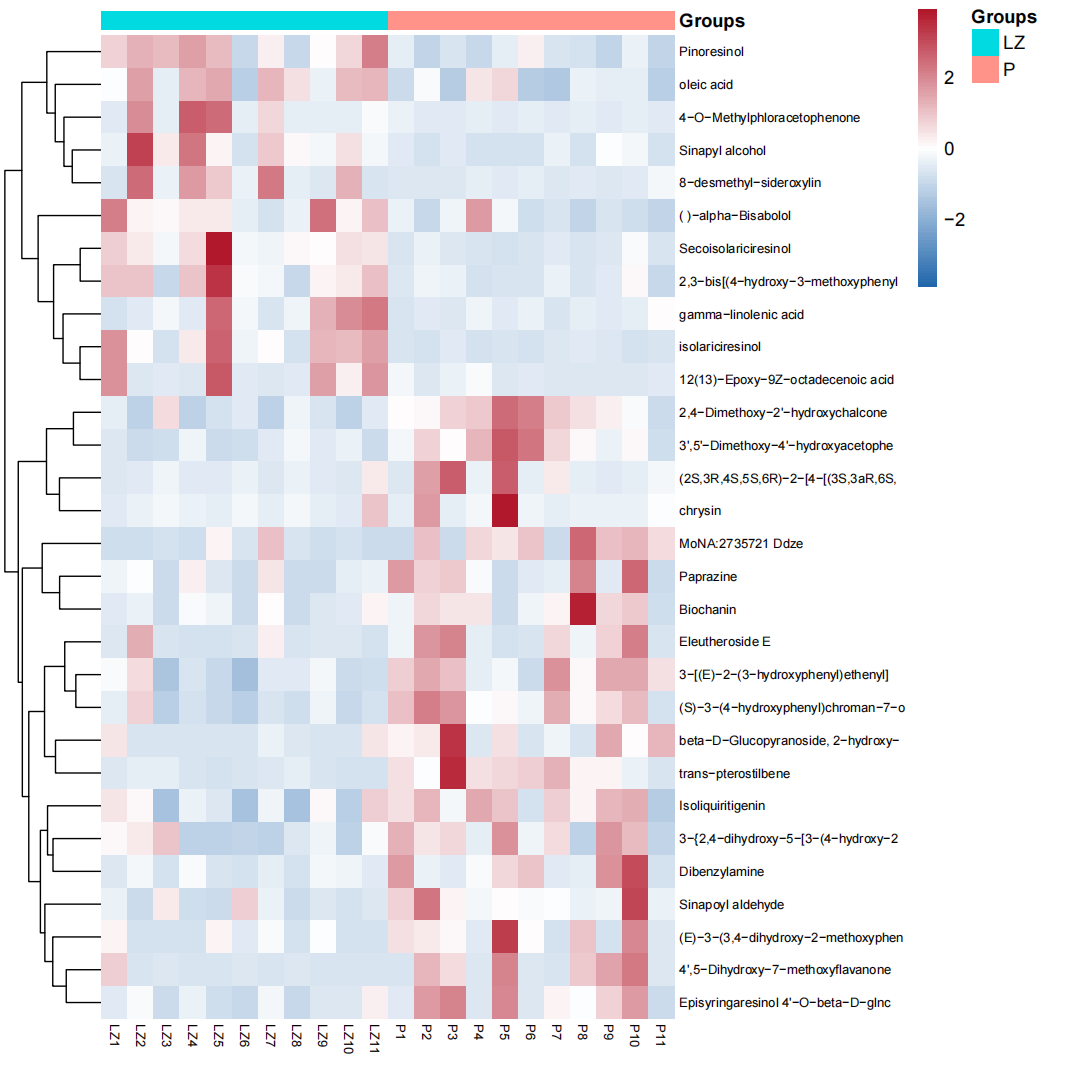


**Supplementary Figure 7.** Clustering of differential metabolite abundance in LZ group and P groups

**Supplementary Table S1.** Specific information about the compound detected by UHPLC-Q-TOF-MS/MS analysis of different fermented grains.

| NO. | Compound name | Adduct | RT/min | m/z | Error ppm | IonMode | Form |
| --- | --- | --- | --- | --- | --- | --- | --- |
| Terpenoids | | | | | | |  |
| 1 | methyl (1S,5S,9S,10R,15R)-15-acetyloxy-6-hydroxy-4,5,7,10,14,14-hexamethyl-8,18-dioxo-19-oxapentacyclo[10.5.2.01,13.02,10.05,9]nonadeca-3,6-diene-9-carboxylate | [M-H]- | 11.1787 | 499.2346 | 1.16145 | negative | LZ |
| 2 | Longicamphenylone | M+H | 13.8281 | 207.1744 | 21.2122 | Positive | LZ、MZ |
| 3 | Hulupinic acid | M+H | 13.6645 | 265.1438 | 2.9925599999999997 | Positive | LZ、P |
| 4 | Globulol | M-H2O-H | 14.5314 | 205.1951 | 9.29521 | Positive | LZ、MZ、P |
| 5 | Dihydroactinidiolide | M+H | 7.0138 | 181.1223 | 12.7213 | Positive | LZ |
| 6 | Canangalia H | M+H | 14.1277 | 249.1854 | 1.28593 | Positive | LZ |
| 7 | alpha-Bisabolol | M+H | 14.3081 | 205.1951 | 0.594899 | Positive | LZ、MZ、P |
| 8 | abscisic acid | M-H | 8.516 | 263.1296 | 2.3195900000000003 | Negative | LZ |
| 9 | 7b,9-Dihydroxy-3-(hydroxymethyl)-1,1,6,8-tetramethyl-5-oxo-1,1a,1b,4,4a,5,7a,7b,8,9-decahydro-9aH-cyclopropa[3,4]benzo[1,2-e]azulen-9a-yl acetate | M+ACN+H | 11.9625 | 432.2374 | 1.4120700000000002 | positive | LZ、MZ、P |
| 10 | 4,7-Methanoazulen-6(1H)-one, 2,4,5,7,8,8a-hexahydro-7-hydroxy-9-(hydroxymethyl)-1,4,9-trimethyl-, (1S,4R,7R,8aS)- | M-H2O+H | 8.4603 | 233.1539 | 3.8612800000000003 | positive | LZ |
| 11 | 2(1H)-Naphthalenone, 4a,5,6,7,8,8a-hexahydro-6-hydroxy-3,8-dimethyl-5-(1-methylethyl)-, (4aR,5S,6S,8R,8aS)- | M-H2O+H | 14.7952 | 219.1743 | 1.39239 | positive | LZ、MZ、P |
| 12 | 1-methyl-4-methylidene-7-(propan-2-yl)-1,2,3,3a,4,5,6,8a-octahydroazulen-1-ol | M-H2O+H | 14.0988 | 203.1794 | 1.95261 | Positive | LZ、MZ、P |
| 13 | 1H-3a,6-Methanoazulene-3-carboxylic acid, octahydro-7,7-dimethyl-8-methylene-, (3S,3aR,6R,8aS)- | M+H | 14.4175 | 235.1693 | 1.2328 | positive | MZ |
| 14 | 1,8-Azulenediol, 1,2,3,3a,4,7,8,8a-octahydro-3a,6-dimethyl-1-(1-methylethyl)-, (1R,3aR,8S,8aS)- | M-H2O+H | 14.292 | 221.1901 | 4.96694 | positive | LZ、MZ |
| 15 | (3E)-7-Hydroxy-3,7-dimethyl-3-octen-1-yl 6-O-(6-deoxy-alpha-L-mannopyranosyl)-beta-D-glucopyranoside | M+FA-H | 6.5185 | 525.2557 | 1.27821 | negative | LZ、MZ、P |
| 16 | (1S,8R,9R)-8-hydroxy-4-(propan-2-ylidene)-10-oxatricyclo[7.2.1.01,5]dodecane-8-carboxylic acid | [M-H]- | 10.3445 | 265.1449 | 0.34529299999999996 | negative | LZ、P |
| Steroids | | | | | | |  |
| 17 | Spirostane -2H, + 1O, O-Pen-dHex | M+HCOO | 12.0256 | 753.4086 | 7.4531600000000005 | Negative | LZ、MZ、P |
| 18 | Spirostane + 1O, -2H, O-Hex-dHex-dHex | M+HCOO | 12.6478 | 929.4774 | 3.67732 | Negative | LZ、MZ、P |
| 19 | Spirost-5-en-3-ol, (3beta,25R)- | M-H2O+H | 12.6225 | 397.3096 | 0.998537 | positive | LZ、MZ、P |
| 20 | ruscogenin | [M+H]+ | 15.079 | 431.3148 | 12.0989 | Positive | MZ、P |
| 21 | Furostane base -2H + O-Hex, O-Hex-dHex-dHex | M+HCOO | 8.7345 | 1093.5448 | 4.35351 | Negative | LZ、MZ、P |
| 22 | Furostane base -2H + 1O, O-Hex, O-Pen-dHex | M-H2O+H | 7.3664 | 871.4611 | 9.03479 | Positive | LZ、MZ、P |
| 23 | diosgenin | [M+H]+ | 12.6096 | 415.32 | 2.42482 | Positive | LZ、MZ、P |
| 24 | Dioscin | M+H | 12.5998 | 869.4868 | 2.5270799999999998 | Positive | LZ、MZ、P |
| 25 | Cholesterol | M+H-H2O | 17.0586 | 369.3513 | 0.743624 | Positive | MZ |
| 26 | cholesta-5,7-dien-3beta-ol | [M+H]+ | 16.3387 | 385.3457 | 0.791953 | Positive | LZ、MZ |
| 27 | Cholecalciferol | M+H | 19.8348 | 385.3459 | 2.37585 | Positive | MZ |
| 28 | Boldione | M+H | 11.046 | 285.185 | 0 | Positive | MZ |
| 29 | beta-D-Glucopyranoside, (3beta,22beta,25R)-26-(beta-D-glucopyranosyloxy)-22-hydroxyfurost-5-en-3-yl O-6-deoxy-alpha-L-mannopyranosyl-(1->2)-O-[6-deoxy-alpha-L-mannopyranosyl-(1->4)]- | M-H2O+H | 8.7415 | 1031.539 | 1.06504 | positive | LZ、MZ、P |
| 30 | 7-ketocholesterol | [M+H]+ | 19.398 | 401.3404 | 1.52078 | Positive | LZ、MZ、P |
| 31 | (3S,8S,9S,10R,13R,14S,17R)-17-((2R)-7-hydroxy-6-methylheptan-2-yl)-10,13-dimethyl-2,3,4,7,8,9,10,11,12,13,14,15,16,17-tetradecahydro-1H-cyclopenta[a]phenanthren-3-ol | M-2H2O+H | 16.3291 | 367.3353 | 1.9108 | Positive | LZ、MZ、P |
| 32 | (3beta,22R,25R)-26-(beta-D-Glucopyranosyloxy)-22-hydroxyfurost-5-en-3-yl 6-deoxy-alpha-L-mannopyranosyl-(1->2)-[beta-D-glucopyranosyl-(1->4)]-beta-D-glucopyranoside | M-H2O+H | 8.8633 | 1047.533 | 6.758769999999999 | positive | LZ、MZ、P |
| 33 | (1beta,3beta,9xi,14xi)-3-Hydroxyspirosta-5,25(27)-dien-1-yl 2-O-(6-deoxy-alpha-L-mannopyranosyl)-alpha-L-arabinopyranoside | M+H | 11.772 | 707.3983 | 2.41587 | positive | LZ、MZ、P |
| 34 | (1beta,3alpha,9xi,14xi)-1-Hydroxyspirosta-5,25(27)-dien-3-yl beta-D-glucopyranosyl-(1->3)-6-deoxy-alpha-L-mannopyranosyl-(1->2)-(3xi)-alpha-D-threo-pentopyranoside | M+H | 7.3257 | 869.4506 | 2.73778 | positive | LZ、MZ、P |
| Polyols | | | | | | |  |
| 35 | AC1L1X1Z | M+Na | 16.7291 | 637.3032 | 1.9154200000000001 | Positive | LZ、MZ、P |
| Polyketides | | | | | | |  |
| 36 | Fallacinol | [M-H] | 6.4948 | 299.0567 | 2.34707 | Negative | MZ、P |
| 37 | Emodin | M-H | 12.1982 | 269.0462 | 4.4237400000000004 | Negative | LZ、MZ |
| 38 | Duclauxin | M+H | 11.3792 | 547.1261 | 2.00801 | Positive | LZ |
| 39 | 1-({[2-(2-furylmethyl)-5-methylpyrrolidinyl]amino}methylene)-7-[8-({[2-(2-fury lmethyl)pyrrolidinyl]amino}methylene)-1,6-dihydroxy-3-methyl-5-(methylethyl)-7 -oxo(2-naphthyl)]-3,8-dihydroxy-6-methyl-4-(methylethyl)naphthalen-2-one | M+2H] | 12.2917 | 415.2107 | 3.16045 | Positive | LZ、MZ、P |
| Phenolic Derivatives | | | | | | |  |
| 40 | Vanillic acid | M-H | 6.4059 | 167.0357 | 4.20214 | Negative | LZ、MZ、P |
| 41 | Undulatoside A | [M+H]+ | 5.7408 | 355.1027 | 1.9766299999999999 | positive | LZ、P |
| 42 | trans-resveratrol | M-H | 7.809 | 227.0716 | 2.62073 | Negative | LZ、P |
| 43 | trans-pterostilbene | M+H | 11.5723 | 257.1172 | 0.712148 | Positive | LZ、MZ、P |
| 44 | trans-Ferulic acid | M+H-H2O | 7.4406 | 177.0545 | 2.75779 | Positive | LZ、MZ、P |
| 45 | SYRINGIC ACID | M+H | 5.6498 | 199.0601 | 0.5365800000000001 | positive | LZ、P |
| 46 | Syringaldehyde | [M+H]+ | 6.5799 | 183.0652 | 4.33427 | Positive | LZ、MZ、P |
| 47 | Sinapyl alcohol | M+H-H2O | 10.2274 | 193.0859 | 0.474155 | Positive | LZ、MZ、P |
| 48 | Sinapoyl aldehyde | M-H | 7.4248 | 207.067 | 4.863569999999999 | Negative | LZ、MZ、P |
| 49 | SINAPIC ACID | M+H-H2O | 7.8177 | 207.0652 | 0.957981 | Positive | LZ、MZ、P |
| 50 | Paprazine | [M+H]+ | 7.9615 | 284.128 | 7.08887 | Positive | LZ、MZ、P |
| 51 | Myristicin | M+H | 12.8992 | 193.0855 | 2.60785 | positive | LZ、MZ |
| 52 | Moupinamide | [M+H]+ | 8.2444 | 314.1388 | 3.8858599999999996 | Positive | LZ、MZ、P |
| 53 | METHYL VANILLATE | M+H | 8.4613 | 183.065 | 0 | positive | LZ、MZ |
| 54 | methyl 4-hydroxy-3,5-dimethoxybenzoate | [M+H]+ | 7.9389 | 213.0758 | 19.6929 | Positive | LZ、P |
| 55 | HOMOVANILLIC ACID | M+H | 5.6211 | 183.0652 | 1.0835700000000001 | positive | MZ |
| 56 | Gnemontanin G | M+H | 8.4859 | 471.1436 | 0.647734 | Positive | P |
| 57 | feruloyltyramine | [M-H]- | 8.207 | 312.125 | 3.22654 | negative | LZ、MZ、P |
| 58 | Ferulic acid | M-H | 6.734 | 193.0514 | 7.271739999999999 | Negative | LZ、MZ、P |
| 59 | FERULATE | [M+H]+ | 7.28 | 195.0647 | 6.64902 | Positive | MZ |
| 60 | Dimethyl-phthalate | M+H | 11.3674 | 195.0654 | 2.03383 | Positive | LZ、MZ、P |
| 61 | Dihydro-ferulic acid | M-H | 6.5036 | 195.0664 | 2.58138 | Negative | LZ、P |
| 62 | Dibutyl phthalate | M+H | 14.4955 | 279.1592 | 0.765238 | Positive | LZ、MZ、P |
| 63 | Coniferaldehyde | M+H | 7.4468 | 179.0701 | 0.5112680000000001 | Positive | LZ、MZ、P |
| 64 | cis-resveratrol | M+H | 7.8428 | 229.0865 | 2.19804 | Positive | P |
| 65 | beta-D-Glucopyranoside, 2-hydroxy-4-(2-propen-1-yl)phenyl 6-O-beta-D-glucopyranosyl- | M-H | 7.1235 | 473.1665 | 1.0964399999999999 | negative | LZ、P |
| 66 | 5-[(E)-2-(4-hydroxy-3-methoxyphenyl)ethenyl]benzene-1,3-diol | M+H | 10.7299 | 259.0954 | 2.3557 | positive | LZ |
| 67 | 4-O-Methylphloracetophenone | [M-H]- | 9.0967 | 181.051 | 0 | negative | LZ、P |
| 68 | 4-methoxy-3-[(4-methoxyphenoxy)methyl]benzaldehyde | M+H | 10.8449 | 273.1121 | 0.33521999999999996 | Positive | LZ、MZ、P |
| 69 | 4-Allyl-2-(beta-D-glucopyranosyloxy)phenyl beta-D-glucopyranoside | M+Na | 5.951 | 497.1621 | 1.7801200000000001 | positive | LZ、P |
| 70 | 3-Hydroxy-4-methoxycinnamic acid | M+H-H2O | 8.8867 | 177.0546 | 3.3610800000000003 | Positive | LZ、MZ、P |
| 71 | 3-[(E)-2-(3-hydroxyphenyl)ethenyl]-5-methoxyphenol | [M-H]- | 9.9526 | 241.0876 | 2.46837 | negative | LZ、MZ、P |
| 72 | 3',5'-Dimethoxy-4'-hydroxyacetophenone | M+H | 6.9214 | 197.0808 | 1.00651 | Positive | LZ、MZ、P |
| 73 | 3,4,5-Trimethoxyphenol | M+H | 6.6202 | 185.0807 | 1.56643 | Positive | LZ、P |
| 74 | 3,4,5-Trimethoxycinnamic acid | M+H-H2O | 7.1162 | 221.0812 | 0.966266 | Positive | LZ、MZ、P |
| 75 | 2-Phenylethyl 6-O-(6-deoxy-alpha-L-mannopyranosyl)-beta-D-glucopyranoside | M+NH4 | 6.2839 | 448.2172 | 1.77025 | positive | LZ、P |
| 76 | 2-METHOXYCINNAMALDEHYDE | M+H | 10.7157 | 163.0752 | 1.2164 | positive | LZ、MZ、P |
| 77 | 2,8-Dimethyl-5,7-dimethoxychromone | M+H | 9.8052 | 235.0966 | 22.9756 | Positive | P |
| 78 | 2,6-Di-tert-butyl-4-hydroxymethylphenol | M+H-H2O | 12.5264 | 219.1744 | 2.78477 | Positive | LZ、MZ |
| 79 | 2,6-DIMETHOXYBENZOIC ACID | M+H | 7.5446 | 183.0655 | 2.75061 | positive | MZ、P |
| 80 | 2,3-DIHYDROXYBENZOIC ACID | M-H | 4.2561 | 153.0199 | 5.883380000000001 | negative | LZ、MZ、P |
| 81 | 1-acetyl-2-hydroxy-4,5-dimethoxybenzene | M+H | 7.3284 | 197.0812 | 1.08394 | Positive | MZ、P |
| 82 | 1-(2-hydroxy-4,6-dimethoxyphenyl)-2-methoxyethan-1-one | M+H | 6.6924 | 227.091 | 0 | Positive | LZ、P |
| 83 | [3,4,5-trihydroxy-6-(hydroxymethyl)oxan-2-yl] 2,4-dihydroxy-6-[(E)-2-phenylethenyl]benzoate | [M+H]+ | 8.1656 | 419.1336 | 0.946543 | positive | MZ |
| 84 | [(2S,3S,4R,5R)-4-hydroxy-2,5-bis(hydroxymethyl)-2-[(2R,3R,4S,5S,6R)-3,4,5-trihydroxy-6-(hydroxymethyl)oxan-2-yl]oxyoxolan-3-yl] (E)-3-(4-hydroxy-3-methoxyphenyl)prop-2-enoate | [M-H]- | 7.652 | 517.1719 | 30.6854 | negative | LZ |
| 85 | (E)-N-[2-hydroxy-2-(4-hydroxyphenyl)ethyl]-3-(4-hydroxy-3-methoxyphenyl)prop-2-enamide | M+H | 6.862 | 330.1335 | 1.57148 | positive | LZ、P |
| 86 | (E)-3-(4-hydroxy-3-methoxyphenyl)prop-2-enamide | M+H | 5.876 | 194.0812 | 1.10069 | positive | MZ |
| 87 | (E)-3-(4-hydroxy-3-methoxyphenyl)-N-[2-(4-hydroxyphenyl)ethyl]prop-2-enamide | [M+H]+ | 8.3975 | 314.1387 | 0.291441 | Positive | LZ、MZ、P |
| 88 | (E)-3-(3,4,5-trimethoxyphenyl)prop-2-enal | M+H | 9.5874 | 223.0965 | 2.25706 | positive | LZ、MZ、P |
| 89 | (2R,3S,4S,5R,6S)-2-(hydroxymethyl)-6-[4-prop-2-enyl-2-[(2S,3R,4S,5S,6R)-3,4,5-trihydroxy-6-(hydroxymethyl)oxan-2-yl]oxyphenoxy]oxane-3,4,5-triol | [M+Na]+ | 5.8256 | 497.162 | 2.02565 | positive | LZ、P |
| Coumarins | | | | | | | |
| 90 | Umbelliferone | M-H | 5.8824 | 161.0252 | 7.48612 | Negative | LZ、MZ、P |
| 91 | Scopoletin | M+H | 6.1719 | 193.0496 | 3.1616400000000002 | Positive | LZ、MZ、P |
| 92 | Haploperoside C | M+H | 5.8387 | 501.159 | 2.0095 | Positive | LZ、MZ |
| 93 | daphnetin | M-H | 4.0632 | 177.0198 | 1.12058 | Negative | LZ |
| 94 | Citropen | [M+H]+ | 10.2349 | 207.0655 | 21.7383 | Positive | LZ、P |
| 95 | Aesculetin | M-H | 5.4363 | 177.02 | 5.6891099999999994 | Negative | LZ、MZ、P |
| 96 | 7,8-Dihydroxycoumarin | M-H | 5.3295 | 177.0199 | 5.085719999999999 | Negative | LZ、MZ、P |
| 97 | 5,6,7-trimethoxychromen-2-one | M+H | 8.2721 | 237.0761 | 4.634119999999999 | positive | MZ |
| 98 | 4-Methylesculetin | M-H | 6.3832 | 191.0357 | 1.5176 | Negative | LZ、MZ、P |
| 99 | 5,6,7-trimethoxychromen-2-one | M+H | 8.2721 | 237.0761 | 4.634119999999999 | positive | MZ |
| 100 | 1H-2-benzopyran-1-one, 6,8-dihydroxy-3-methyl- | [M-H]- | 8.195 | 191.0357 | 3.6742199999999996 | negative | LZ、MZ、P |
| Peptides | | | | | | |  |
| 100 | Xefoampeptide E | M+H | 16.0577 | 524.4058 | 1.51306 | Positive | MZ、P |
| 101 | Xefoampeptide A | M+H | 15.4927 | 510.3889 | 1.7339900000000001 | Positive | P |
| 102 | Pyrrolo[1,2-a]pyrazine-1,4-dione, hexahydro-3-(1-methylethyl)- | M+H | 5.165 | 197.1282 | 1.00627 | positive | LZ |
| 103 | N-Fructosyl pyroglutamate | M-H | 0.969 | 290.0885 | 5.15487 | Negative | LZ、MZ、P |
| 104 | GameXPeptide C | M+H | 13.4457 | 552.4102 | 0.441956 | Positive | P |
| 105 | Cystine | [M-H]- | 7.7208 | 239.0219 | 20.4926 | negative | MZ |
| 106 | Arenamide A | M+Na | 14.3913 | 694.4133 | 9.58042 | Positive | MZ |
| 107 | 3-butan-2-yl-2,3,6,7,8,8a-hexahydropyrrolo[1,2-a]pyrazine-1,4-dione | M+H | 6.114 | 211.1443 | 1.44534 | positive | LZ |
| Nucleosides | | | | | | |  |
| 108 | Adenosine | M+H | 1.7096 | 268.1046 | 2.27655 | Positive | MZ、P |
| Naphthalenes | | | | | | |  |
| 109 | Tanshinone Iia | [M+H]+ | 15.5059 | 295.1323 | 2.37826 | positive | MZ |
| 110 | Eleutherol | M+H | 10.7094 | 245.0803 | 2.80171 | Positive | LZ、P |
| 111 | 1-Naphthol | M+H | 8.8949 | 145.0645 | 3.4711300000000005 | Positive | LZ、MZ、P |
| 112 | (1R,2R,4aS,8aS)-2-[(2R)-2-Hydroxybutyl]-1,3-dimethyl-1,2,4a,5,6,7,8,8a-octahydro-1-naphthalenecarboxylic acid | M-H2O+H | 13.2981 | 263.202 | 7.536639999999999 | positive | LZ |
| Macrolides | | | | | | |  |
| 113 | 5,13,15-trihydroxy-9-methyl-10-oxabicyclo[10.4.0]hexadeca-1(12),13,15-triene-3,11-dione | [M-H]- | 8.8892 | 307.1188 | 0.596204 | negative | LZ、MZ |
| 114 | [(4E)-7-acetyloxy-6-hydroxy-2-methyl-10-oxo-2,3,6,7,8,9-hexahydrooxecin-3-yl] (E)-but-2-enoate | [M-H]- | 8.3027 | 471.1312 | 2.52624 | negative | LZ |
| Lipids | | | | | | |  |
| 115 | Undecaethylene glycol | M+H | 6.3694 | 503.3061 | 0.181903 | Positive | LZ、MZ、P |
| 116 | Suberic acid | M-H | 6.5991 | 173.0825 | 4.23165 | Negative | MZ |
| 117 | Stearidonic acid ethyl ester | M+H | 14.6152 | 305.2473 | 0.999767 | Positive | LZ、P |
| 118 | SPHINGANINE | M+H | 12.4513 | 302.3054 | 1.31235 | positive | LZ、MZ、P |
| 119 | Phytosphingosine | M+H | 11.59 | 318.3003 | 0.9587680000000001 | Positive | LZ、MZ、P |
| 120 | Phytoceramide C2 | M+H | 14.0142 | 360.3109 | 0.254094 | Positive | LZ、P |
| 121 | PE(16:0/18:1); [M-H]- C39H75N1O8P1 | M-H | 15.973 | 716.5253 | 3.23693 | Negative | MZ |
| 122 | PC(19:1/0:0); [M+H]+ C27H55N1O7P1 | M+H | 14.7575 | 536.3695 | 3.98274 | Positive | LZ、MZ、P |
| 123 | PC(18:2/0:0); [M+H]+ C26H51N1O7P1 | M+H | 13.2789 | 520.3384 | 3.75355 | Positive | LZ、MZ、P |
| 124 | PC(0:0/20:4); [M+H]+ C28H51N1O7P1 | M+H | 14.0723 | 544.3353 | 9.1944 | Positive | LZ、MZ、P |
| 125 | PC(0:0/18:1); [M+H]+ C26H53N1O7P1 | M+H | 14.0815 | 522.3538 | 4.0896099999999995 | Positive | LZ、MZ、P |
| 126 | PC(0:0/18:0); [M+H]+ C26H55N1O7P1 | M+H | 15.0379 | 524.3697 | 3.7247 | Positive | LZ、P |
| 127 | PC(0:0/16:0); [M+H]+ C24H51N1O7P1 | M+H | 13.7391 | 496.3391 | 2.39792 | Positive | LZ、MZ、P |
| 128 | palmitoleic acid | M+H | 13.4281 | 255.2321 | 0.418488 | Positive | LZ、MZ、P |
| 129 | Palmitelaidic acid | M+H-H2O | 13.4168 | 237.2214 | 1.73672 | Positive | LZ、MZ、P |
| 130 | Palmitamide | M+H | 16.1887 | 256.2635 | 1.9053900000000001 | Positive | LZ、MZ、P |
| 131 | oleic acid | M+H-H2O | 17.8321 | 265.2526 | 1.49566 | Positive | LZ、MZ、P |
| 132 | Octanedioic acid | M-H | 6.4843 | 173.0832 | 6.964589999999999 | Negative | P |
| 133 | Octadecanamide | M+H | 17.8716 | 284.2948 | 4.1864300000000005 | Positive | LZ、MZ、P |
| 134 | Nonaethylene glycol | M+H | 5.8373 | 415.2535 | 1.24936 | Positive | LZ、MZ、P |
| 135 | N-Oleoylethanolamine | M+H | 15.98 | 326.3051 | 0.37409899999999996 | Positive | LZ、MZ、P |
| 136 | Monoolein | M+H | 16.9888 | 357.2995 | 1.36659 | Positive | LZ、P |
| 137 | Monolinolenin (9c,12c,15c) | M+H | 12.9456 | 353.2683 | 1.98688 | Positive | LZ、MZ、P |
| 138 | LPC 18:2 | M+H | 13.0107 | 520.3378 | 6.09952 | Positive | LZ |
| 139 | Linoleoyl ethanolamide | M+H | 14.9632 | 324.2897 | 2.1644400000000004 | Positive | LZ、MZ、P |
| 140 | linoleic acid | [M+H]+ | 13.9892 | 281.2476 | 2.06165 | Positive | LZ、MZ、P |
| 141 | Likely Trp-C3:0 + O (hydroxylated) | M+H | 4.9842 | 277.1184 | 1.4316200000000001 | Positive | LZ |
| 142 | Lauryldiethanolamine | M+H | 10.6435 | 274.274 | 0 | Positive | LZ、MZ、P |
| 143 | L-alpha-Glycerylphosphorylcholine | M+H | 0.884 | 258.1104 | 1.0641100000000001 | Positive | LZ、MZ、P |
| 144 | Hexopyranoside, 3,4-dimethoxyphenyl 6-O-(6-deoxy-alpha-L-mannopyranosyl)- | M+NH4 | 5.0097 | 480.2068 | 2.54203 | positive | P |
| 145 | Hexaethylene glycol | M+H | 4.8805 | 283.175 | 0 | Positive | LZ、P |
| 146 | Glycerol 1-stearate | M+H | 18.3768 | 359.315 | 13.9288 | Positive | LZ、MZ、P |
| 147 | gamma-linolenic acid | [M+H]+ | 14.1013 | 279.2316 | 1.42078 | Positive | LZ、MZ |
| 148 | GalCer(d18:2/18:1); [M+H]+ C42H78N1O8 | M+H | 17.5594 | 724.5694 | 4.63298 | Positive | MZ、P |
| 149 | Fisetin 3'4'-Dimethyl Ether | [M-H]- | 9.7215 | 313.0726 | 1.94956 | nan | P |
| 150 | FA 18:1+3O | M-H | 10.0213 | 329.2338 | 8.5278 | Negative | LZ、MZ、P |
| 151 | Ethyl | M+H | 9.6933 | 216.1591 | 0.494134 | Positive | P |
| 152 | Dibutyl adipate | M+H | 14.7548 | 259.1908 | 3.06129 | Positive | MZ |
| 153 | Decaethylene glycol | M+H | 6.1728 | 459.2798 | 0.46512600000000004 | Positive | LZ、MZ、P |
| 154 | Cyclohexasiloxane, dodecamethyl- | M+H | 19.6743 | 445.1187 | 5.14201 | Positive | MZ |
| 155 | Citric acid | M-H | 0.9727 | 191.0204 | 2.07689 | Negative | MZ |
| 156 | cis,cis-9,12-Octadecadien-1-ol | M+H | 14.5491 | 267.2684 | 1.48438 | Positive | LZ、MZ、P |
| 157 | Benzyl 6-O-(6-deoxy-alpha-L-mannopyranosyl)-beta-D-glucopyranoside | M+NH4 | 5.7032 | 434.2013 | 1.6165399999999999 | positive | P |
| 158 | Azelaic acid | M-H | 7.4431 | 187.0984 | 5.62732 | Negative | LZ、MZ、P |
| 159 | amylamine-C18:0 | M+H | 16.3821 | 354.3726 | 1.11952 | Positive | P |
| 160 | AEG(o-16:2/18:2) | M+H | 18.9772 | 575.4999 | 5.4088199999999995 | Positive | LZ |
| 161 | 9Z,11E,13E-Octadecatrienoic acid methyl ester | M+H | 15.4701 | 293.2473 | 1.0406799999999998 | Positive | LZ |
| 162 | 9-Oxo-10E,12Z-octadecadienoic acid | M+H | 14.1639 | 295.2268 | 2.68763 | Positive | LZ、MZ、P |
| 163 | 9-Octadecenamide, (Z)- | M+H | 16.5606 | 282.2793 | 1.08111 | Positive | LZ、MZ、P |
| 164 | 9,12-Octadecadiynoic Acid | M+H | 13.9293 | 277.2162 | 0.660516 | Positive | MZ |
| 165 | 8-{(1S,5R)-4-Oxo-5-[(2Z)-2-penten-1-yl]-2-cyclopenten-1-yl}octanoic acid | M-H2O+H | 9.7783 | 275.2004 | 1.4416 | positive | LZ、MZ |
| 166 | 3-Hexen-1-ol O-b-D-glucopyranoside | [M+Na]+ | 7.9581 | 285.1315 | 5.24449 | Positive | LZ、MZ、P |
| 167 | 2,2'-(Tetradecylimino)diethanol | M+H | 11.5444 | 302.3054 | 1.31235 | Positive | LZ、MZ、P |
| 168 | 1-Hexadecanoyl-sn-glycerol | M+H | 16.6632 | 331.284 | 0 | Positive | LZ、MZ、P |
| 169 | 1-Hexadecanoyl-sn-glycero-3-phosphocholine | M+Na | 13.7559 | 518.3204 | 1.17756 | Positive | LZ、MZ、P |
| 170 | 1-Hexadecanoyl-2-(9Z-octadecenoyl)-sn-glycero-3-phosphocholine | M+Na | 17.172 | 782.563 | 6.39546 | Positive | LZ、P |
| 171 | 1-Heptadecanoyl-sn-glycero-3-phosphocholine | M+H | 14.2572 | 510.3536 | 4.66414 | Positive | MZ |
| 172 | 15-OxoEDE | M+H-H2O | 15.1288 | 305.2467 | 0.999767 | Positive | LZ、MZ |
| 173 | 13S-Hydroxy-9Z,11E,15Z-octadecatrienoic acid | M+H-H2O | 13.5617 | 277.2162 | 0.660516 | Positive | LZ、MZ、P |
| 174 | 13-Keto-9Z,11E-octadecadienoic acid | M+H-H2O | 14.034 | 277.2162 | 0.660516 | Positive | LZ、MZ、P |
| 175 | 13-Docosenamide, (Z)- | 2M+H | 14.1963 | 675.6739 | 1.62598 | Positive | MZ |
| 176 | 12-Oxodihydrophytodienoic acid | M+H-H2O | 14.3892 | 277.2161 | 0.330258 | Positive | LZ、MZ、P |
| 177 | 12(13)-Epoxy-9Z-octadecenoic acid | 243.2 | 13.1853 | 243.2107 | 2.82326 | Positive | LZ、MZ、P |
| 178 | 1-(9Z-Octadecenoyl)-sn-glycero-3-phosphocholine | M+H | 14.1952 | 522.3535 | 12.3856 | Positive | MZ |
| 179 | linolenic acid | M+H | 13.7682 | 279.2319 | 0.327873 | Positive | LZ、MZ、P |
| Heterocyclic Compounds | | | | | | |  |
| 180 | Cyclotrisiloxane, hexamethyl- | M+H | 0.963 | 223.0636 | 1.7785400000000002 | Positive | MZ |
| 181 | Cyclotetrasiloxane, octamethyl- | M+H-CH4 | 0.963 | 281.0514 | 1.41159 | Positive | MZ |
| 182 | Cyclopentasiloxane, decamethyl- | M+H | 6.71 | 371.1047 | 7.318919999999999 | Positive | MZ |
| 183 | 5-phenyl-1,3-oxazolidin-2-one | M+NH4 | 6.6759 | 181.101 | 22.0755 | positive | MZ、P |
| Lignans | | | | | | | |
| 184 | syringaresinol | M-H | 8.8698 | 417.1559 | 2.19469 | Negative | LZ、MZ、P |
| 185 | Secoisolariciresinol | M-H | 7.5956 | 361.1657 | 0.760476 | Negative | LZ、MZ、P |
| 186 | Pinoresinol | M-H | 9.1104 | 357.1343 | 0.854513 | Negative | LZ、MZ、P |
| 187 | isolariciresinol | M-H | 6.9374 | 359.1501 | 0.254915 | Negative | LZ、MZ、P |
| 188 | Grossamide or its isomer | M+H | 10.309 | 625.2529 | 0.09761669999999999 | Positive | MZ |
| 189 | Episyringaresinol 4'-O-beta-D-glncopyranoside | [M+Na]+ | 7.0271 | 603.2036 | 10.6243 | Positive | LZ、MZ、P |
| 190 | Eleutheroside E | [M+Na]+ | 5.9986 | 765.2567 | 4.3069 | Positive | LZ、MZ、P |
| 191 | 6,7-bis(hydroxymethyl)-1-methoxy-8-(3,4,5-trimethoxyphenyl)-5,6,7,8-tetrahydronaphthalene-2,3-diol | M+FA-H | 6.5867 | 465.1761 | 0.19681300000000002 | negative | LZ、MZ、P |
| 192 | 5-[6-(3-hydroxy-4-methoxyphenyl)-1,3,3a,4,6,6a-hexahydrofuro[3,4-c]furan-3-yl]-2-methoxyphenol | M-H2O+H | 9.13 | 341.1382 | 0.626207 | positive | LZ、MZ、P |
| 193 | 4-[(3R,3aR,6S,6aR)-6-(4-hydroxy-3,5-dimethoxyphenyl)-1,3,3a,4,6,6a-hexahydrofuro[3,4-c]furan-3-yl]-2,6-dimethoxyphenol | M+H | 8.8843 | 419.1691 | 2.18414 | positive | LZ、MZ、P |
| 194 | 3,4,5-TRIMETHOXYBENZALDEHYDE | M+H | 8.9193 | 197.0797 | 6.58104 | Positive | MZ |
| 195 | 2-[[5-(4-hydroxy-3,5-dimethoxyphenyl)-6,7-bis(hydroxymethyl)-1,3-dimethoxy-5,6,7,8-tetrahydronaphthalen-2-yl]oxy]-6-(hydroxymethyl)oxane-3,4,5-triol | M+NH4 | 5.4768 | 600.2641 | 1.52521 | positive | P |
| 196 | 2,3-bis[(4-hydroxy-3-methoxyphenyl)methyl]butane-1,4-diol | M-2H2O+H | 7.6212 | 327.159 | 0 | Positive | LZ、MZ、P |
| 197 | (2S,3R,4S,5S,6R)-2-[4-[(3S,3aR,6S,6aR)-6-[3,5-dimethoxy-4-[(2S,3R,4S,5S,6R)-3,4,5-trihydroxy-6-(hydroxymethyl)oxan-2-yl]oxyphenyl]-1,3,3a,4,6,6a-hexahydrofuro[3,4-c]furan-3-yl]-2,6-dimethoxyphenoxy]-6-(hydroxymethyl)oxane-3,4,5-triol | M+NH4 | 6.0179 | 760.3017 | 0.401388 | positive | L、P |
| 198 | (2S,3R,4S,5S,6R)-2-[4-[(3S,3aR,6S,6aR)-3-(4-hydroxy-3,5-dimethoxyphenyl)-1,3,3a,4,6,6a-hexahydrofuro[3,4-c]furan-6-yl]-2,6-dimethoxyphenoxy]-6-(hydroxymethyl)oxane-3,4,5-triol | M+NH4 | 7.0101 | 598.2485 | 2.55057 | positive | LZ、P |
| 199 | (1R,2S)-7-hydroxy-1-(4-hydroxy-3,5-dimethoxyphenyl)-2-N,3-N-bis[2-(4-hydroxyphenyl)ethyl]-6,8-dimethoxy-1,2-dihydronaphthalene-2,3-dicarboxamide | M+H | 9.0854 | 685.2745 | 0.8016 | positive | LZ、MZ、P |
| Flavonoids and their derivatives | | | | | | |  |
| 200 | Tectorigenin | M-H | 6.3032 | 299.0564 | 1.3266 | Negative | LZ、MZ、P |
| 201 | 2,3-Dimethoxyxanthen-9-one | M+H | 8.8189 | 257.0812 | 0.8309559999999999 | Positive | LZ、P |
| 202 | Mangiferin | M-H | 5.5063 | 421.078 | 4.71084 | Negative | MZ、P |
| 203 | Genistein | M-H | 6.5138 | 269.0462 | 2.7223 | Negative | LZ、MZ、P |
| 204 | Equol | M+H | 10.4614 | 243.1009 | 0.376604 | Positive | LZ、P |
| 205 | Daidzein | M+H | 9.4774 | 255.0653 | 1.19646 | Positive | LZ、MZ、P |
| 206 | biochanin A | [M-H]- | 8.18 | 283.0618 | 2.80313 | negative | LZ、MZ、P |
| 207 | Biochanin | [M+H]+ | 7.5315 | 285.0759 | 0.321152 | Positive | LZ、MZ、P |
| 208 | 1,6-dihydroxy-3-methoxy-8-methylxanthen-9-one | M+H | 12.1854 | 273.0759 | 3.2409 | positive | LZ、P |
| 209 | (S)-3-(4-hydroxyphenyl)chroman-7-ol | [M+H]+ | 9.9658 | 243.1016 | 6.527819999999999 | Positive | LZ、MZ、P |
| 210 | Techtochrysin | M+H | 6.7169 | 269.081 | 29.7154 | Positive | LZ、MZ、P |
| 211 | taxifolin | [M+H]+ | 6.1848 | 305.0654 | 2.0007200000000003 | positive | M、P |
| 212 | Tangeretin | M+H | 11.9235 | 373.1274 | 1.55398 | Positive | L、MZ |
| 213 | 2-(3,4-Dihydroxybenzylidene)-6-hydroxybenzofuran-3(2H)-one | M-H | 7.9104 | 269.0462 | 0.7940020000000001 | Negative | LZ、MZ、P |
| 214 | SNG | M-H | 6.7368 | 577.1569 | 3.2783 | Negative | MZ |
| 215 | SAKURANETIN | M-H | 10.4024 | 285.0776 | 2.1410099999999996 | Negative | MZ、P |
| 216 | Kaempferol-3-O-rhamnoside-7-O-rhamnoside | [M+H] | 6.9095 | 579.169 | 3.4776599999999998 | Positive | MZ |
| 217 | Quercitrin | [M+H] | 7.1172 | 447.0929 | 0.204773 | Positive | M、P |
| 218 | Quercetin-3-O-glucoside | M+H | 6.6448 | 463.0882 | 25.5027 | Negative | MZ |
| 219 | Quercetin-3,7-O-alpha-L-dirhamnopyranoside | [M+H] | 6.3762 | 593.1509 | 0.2058 | Positive | MZ |
| 220 | Quercetin | M+H | 7.4945 | 303.0495 | 2.21543 | Positive | MZ |
| 221 | Naringenin-7-O-glucoside | M-H | 7.1532 | 433.1137 | 0.704608 | Negative | P |
| 222 | Pinocembrine | M+H | 11.0282 | 257.0809 | 0.356124 | Positive | LZ、MZ、P |
| 223 | pinocembrin | [M-H]- | 11.0244 | 255.067 | 3.9483099999999998 | negative | LZ、MZ、P |
| 224 | naringenin | M+H | 7.4368 | 273.0758 | 0.670529 | Positive | MZ、P |
| 225 | licochalcone B | [M-H]- | 8.3891 | 285.0774 | 1.39165 | negative | LZ、MZ、P |
| 226 | Galangin 3-methyl ether | M+H | 8.7741 | 285.0759 | 3.10448 | Positive | MZ |
| 227 | Kaempferol-7-O-rhamnoside | M+H | 6.9095 | 433.113 | 0 | Positive | MZ |
| 228 | Isoliquiritigenin | M+H | 8.4325 | 257.0809 | 4.27347 | Positive | LZ、MZ、P |
| 229 | Homobutein | M+H | 8.6817 | 287.0915 | 1.7007900000000002 | Positive | LZ、MZ、P |
| 230 | Genkwanin | M+H | 8.2323 | 285.0757 | 0.963456 | Positive | LZ、MZ、P |
| 231 | Eupatorin | [M+H]+ | 10.994 | 345.0971 | 8.400960000000001 | Positive | MZ |
| 232 | Chrysoeriol | M-H | 9.6904 | 299.0566 | 2.04093 | Negative | LZ、P |
| 233 | Chrysin | [M+H]+ | 8.8892 | 255.0652 | 18.8439 | Positive | LZ、MZ、P |
| 234 | butein | M+H | 9.3474 | 273.076 | 0 | Positive | LZ、MZ、P |
| 235 | Avicularin | M-H | 6.9715 | 433.0784 | 3.66425 | Negative | MZ、P |
| 236 | Apigeninidin | M+H | 6.9454 | 255.0651 | 0.358939 | Positive | MZ、P |
| 237 | Apigenin | M+H | 9.5332 | 271.0605 | 1.80138 | Positive | LZ、MZ、P |
| 238 | Alpinetin | M+H | 9.7561 | 271.0965 | 1.8011400000000002 | Positive | LZ、MZ、P |
| 239 | 8-desmethyl-sideroxylin | M+H | 8.9981 | 299.0911 | 0.306103 | Positive | LZ、MZ |
| 240 | 7-O-Methylchrysin | [M+H]+ | 9.485 | 269.0808 | 3.06219 | Positive | LZ、MZ、P |
| 241 | 7-methoxy-2-phenyl-4H-chromen-4-one | [M+H]+ | 11.3863 | 253.086 | 15.796 | Positive | LZ、MZ、P |
| 242 | 7-hydroxyflavone | [M+H]+ | 9.9069 | 239.0704 | 1.65947 | positive | LZ、MZ、P |
| 243 | 7-Hydroxyflavanone | M+H | 10.4173 | 241.086 | 0 | Positive | LZ、MZ、P |
| 244 | 7-hydroxy-2-(4-hydroxyphenyl)-5-methoxy-2,3-dihydrochromen-4-one | M+H | 7.3954 | 287.091 | 0 | positive | LZ |
| 245 | 7-hydroxy-2-(4-hydroxyphenyl)-5-methoxy-2,3-dihydro-4h-chromen-4-one | [M+H]+ | 7.506 | 287.0914 | 1.38189 | positive | LZ、MZ、P |
| 246 | 7,8,2'-Trihydroxyflavone | M+H | 6.9587 | 271.0606 | 2.25172 | Positive | LZ、MZ、P |
| 247 | 7,4'-Dihydroxyflavone | [M-H]- | 7.9096 | 253.0516 | 2.41197 | negative | LZ、MZ、P |
| 248 | 7,3'-Dimethoxyflavone | M+H | 11.3943 | 283.0969 | 3.1261799999999997 | Positive | P |
| 249 | 7,3',4'-Trihydroxyflavone | [M-H]- | 8.1437 | 269.0461 | 0.453715 | negative | LZ、MZ、P |
| 250 | 6-desmethyl-sideroxylin | M+H | 7.2492 | 299.0912 | 0.612207 | Positive | LZ、MZ、P |
| 251 | 5-Hydroxy-7-methoxyflavanone | M+H | 13.0706 | 271.0966 | 1.4634200000000002 | Positive | LZ |
| 252 | 5-hydroxy-2-(4-hydroxyphenyl)-7-methoxy-4H-chromen-4-one | [M+H]+ | 7.2616 | 285.0757 | 14.9869 | Positive | LZ |
| 253 | 5-hydroxy-2-(4-hydroxyphenyl)-7-methoxy-2,3-dihydrochromen-4-one | M+H | 9.9532 | 287.0915 | 1.7007900000000002 | positive | LZ、MZ、P |
| 254 | 5-hydroxy-2-(4-hydroxyphenyl)-3-[(2S,3R,4S,5S,6R)-3,4,5-trihydroxy-6-(hydroxymethyl)oxan-2-yl]oxy-7-[(2S,3R,4R,5R,6S)-3,4,5-trihydroxy-6-methyloxan-2-yl]oxychromen-4-one | M-H | 6.2086 | 593.1512 | 0.3087 | negative | MZ |
| 255 | 5,7-Dimethoxy-4'-hydroxyflavanone | M+H | 9.6874 | 301.1071 | 0.304054 | Positive | LZ、MZ、P |
| 256 | 5,7-dimethoxy-2-phenyl-4H-chromen-4-one | [M+H]+ | 7.624 | 283.0961 | 13.7981 | Positive | P |
| 257 | 5,6,7,8-tetramethoxy-2-(4-methoxyphenyl)chromen-4-one [IIN-based: Match] | [M+H]+ | 11.624 | 373.1273 | 2.9443799999999998 | Positive | MZ |
| 258 | 5,4'-dihydroxy-6-C-methyl-7-methoxy-flavanone | M-H | 8.6527 | 299.0929 | 2.95899 | Negative | LZ、MZ、P |
| 259 | 4'-Hydroxy-7-methoxyflavone | M+H | 9.9405 | 269.0809 | 0.340242 | Positive | LZ、MZ、P |
| 260 | 4-Hydroxy-2',4',6'-trimethoxychalcone | M+H | 10.3076 | 315.1224 | 1.84002 | Positive | P |
| 261 | 4,7-Dihydroxyflavone | [M+H]+ | 7.938 | 255.0654 | 18.0662 | Positive | LZ、MZ、P |
| 262 | 4',5-Dihydroxy-7-methoxyflavanone | M+H | 10.3272 | 287.0917 | 2.44488 | Positive | LZ、MZ、P |
| 263 | 3-deoxysappanchalcone | [M-H]- | 9.4618 | 269.0826 | 2.2682700000000002 | negative | LZ、MZ、P |
| 264 | 3-{2,4-dihydroxy-5-[3-(4-hydroxy-2-methoxyphenyl)-1-(4-hydroxyphenyl)propyl]phenyl}-1-(4-hydroxyphenyl)propan-1-one | M-H2O+H | 9.9199 | 497.195 | 0 | Positive | LZ、MZ、P |
| 265 | 3,3'-Dihydroxyflavone | M-H | 9.4576 | 253.0511 | 0.422095 | Negative | LZ、MZ、P |
| 266 | 3,3',4'-Trimethoxyflavone | M+H | 13.0218 | 313.1069 | 0.292401 | Positive | MZ |
| 267 | 2-[[(2R,3S)-2-(3,4-dihydroxyphenyl)-3,5-dihydroxy-3,4-dihydro-2H-chromen-7-yl]oxy]oxane-3,4,5-triol | [M-H]- | 5.6715 | 421.114 | 0 | negative | MZ、P |
| 268 | 2',6'-dihydroxy-4'-methoxydihydrochalcone | [M+H]+ | 12.1695 | 273.1121 | 0.33521999999999996 | positive | LZ、MZ |
| 269 | 2,4-Dimethoxy-2'-hydroxychalcone | M+H | 10.9987 | 285.1121 | 3.2111 | Positive | LZ、MZ、P |
| 270 | 2',4'-Dihydroxychalcone | [M-H]- | 11.6749 | 239.0726 | 6.70166 | negative | LZ、P |
| 271 | 2',3'-Dimethoxyflavanone | M+H | 11.1375 | 285.1124 | 1.3914799999999998 | Positive | MZ |
| 272 | 2-(3,4-dihydroxyphenyl)-7-hydroxy-2,3-dihydrochromen-4-one | [M-H]- | 9.3197 | 271.062 | 3.7153300000000002 | negative | LZ、MZ、P |
| 273 | 2-(3,4-dihydroxyphenyl)-5,7-dihydroxy-3-[(2S,3R,4R,5R,6S)-3,4,5-trihydroxy-6-methyloxan-2-yl]oxychromen-4-one | M+H | 7.5315 | 449.1092 | 2.6501099999999997 | positive | MZ |
| 274 | (E)-3-(3,4-dihydroxy-2-methoxyphenyl)-1-(4-hydroxyphenyl)prop-2-en-1-one | M+H | 8.4303 | 287.0913 | 1.0629899999999999 | positive | LZ、MZ、P |
| 275 | (E)-1-(4-hydroxy-2-methoxyphenyl)-3-(4-hydroxyphenyl)prop-2-en-1-one | M+H | 9.4845 | 271.0966 | 2.13885 | positive | LZ、MZ、P |
| 276 | (2R,3R)-3,5-dihydroxy-2-(4-hydroxyphenyl)-7-methoxy-2,3-dihydrochromen-4-one | M+H | 8.6718 | 303.0864 | 1.3089600000000001 | positive | LZ、MZ、P |
| 277 | (2E)-1-(2H,3H-benzo[e]1,4-dioxin-6-yl)-3-(7-methoxy(2H-benzo[3,4-d]1,3-dioxole n-5-yl))prop-2-en-1-one | M+H | 10.9716 | 341.1015 | 1.4314799999999999 | Positive | LZ、MZ、P |
| 278 | (2E)-1-(2,4-dihydroxyphenyl)-3-(4-hydroxyphenyl)-2-propen-1-one | [M+H]+ | 10.0837 | 257.0817 | 6.64768 | Positive | LZ、MZ、P |
| 279 | Loureirin A | [M+Na]+ | 11.408 | 309.10938 | 0 | Positive | LZ、MZ、P |
| 280 | Loureirin B | [M+Na]+ | 13.685 | 339.11975 | 0 | Positive | LZ、MZ、P |
| Cabohydrates and glycosides | | | | | | |  |
| 281 | Uridine 5'-diphospho-N-acetylglucosamine | M-H | 1.2269 | 606.0751 | 1.8127 | Negative | MZ |
| 282 | sucrose | M+Na | 0.9011 | 365.1054 | 3.84496 | Positive | LZ、MZ、P |
| 283 | Stachyose | M+Na | 0.8949 | 689.2088 | 1.7711599999999998 | Positive | P |
| 284 | Sorbitol | M-H | 0.929 | 181.0724 | 4.55055 | Negative | LZ、MZ、P |
| 285 | RAFFINOSE | M+Cl | 0.9295 | 539.1389 | 1.69813 | Negative | LZ、MZ、P |
| 286 | Palatinose | M+Cl | 0.9307 | 377.0859 | 0.24279 | Negative | LZ、MZ、P |
| 287 | Melibiose | Unknown | 0.9553 | 387.1144 | 0.788334 | Negative | LZ、MZ、P |
| 288 | maltotriose | [M+Na]+ | 0.924 | 527.1573 | 1.3893799999999998 | positive | LZ、P |
| 289 | Maltitol | M-H | 0.8868 | 343.1246 | 0.0889402 | Negative | LZ、P |
| 290 | Lactulose | M+H-H2O | 0.8285 | 325.1133 | 0.9386760000000001 | Positive | MZ |
| 291 | D-Mannitol | [M-H+HCOOH] | 0.8369 | 227.078 | 4.43497 | Negative | P |
| 292 | ARABITOL(D) | [M-H]- | 0.9265 | 151.0616 | 3.9394199999999997 | negative | LZ、MZ、P |
| 293 | alpha,alpha-Trehalose | M+NH4 | 0.9245 | 360.1501 | 0.8473569999999999 | Positive | LZ、MZ、P |
| 294 | ADONITOL | [M-H]- | 0.8578 | 151.0619 | 5.95964 | negative | MZ、P |
| 295 | (2R,3S,4S,5R,6S)-2-[[(2S,3R,4R)-3,4-dihydroxy-4-(hydroxymethyl)oxolan-2-yl]oxymethyl]-6-(3,4,5-trimethoxyphenoxy)oxane-3,4,5-triol | [M+Na]+ | 5.3088 | 501.1569 | 2.19219 | positive | LZ、MZ、P |
| 296 | (2R,3S,4S,5R,6S)-2-[(3,4,5-trihydroxyoxan-2-yl)oxymethyl]-6-(3,4,5-trimethoxyphenoxy)oxane-3,4,5-triol | [M+Na]+ | 5.1564 | 501.1569 | 2.19219 | positive | LZ、P |
| 297 | (2R,3S,4S,5R,6S)-2-(hydroxymethyl)-6-(3,4,5-trimethoxyphenoxy)oxane-3,4,5-triol | M+H | 5.1375 | 347.1317 | 3.69235 | positive | P |
| Alkaloids and their derivatives | | | | | | | |
| 298 | Uric Acid | M-H | 5.9887 | 377.1449 | 2.91302 | Positive | LZ、P |
| 299 | Riboflavin | M+H | 1.6199 | 138.091 | 0 | positive | MZ |
| 300 | PHENYLETHANOLAMINE | M+H | 5.621 | 169.0757 | 1.80496 | Positive | LZ |
| 301 | Norharman | M+H | 14.2226 | 205.1948 | 1.0410700000000002 | Positive | LZ |
| 302 | N-Cyclohexanecarbonylpentadecylamine | 205.2 | 6.7261 | 245.0939 | 3.67317 | negative | LZ |
| 303 | N-ACETYLTRYPTOPHAN | M-H | 5.9708 | 204.1247 | 1.49504 | Positive | LZ |
| 304 | N6-(DELTA2-ISOPENTENYL)-ADENINE | [M+H]+ | 1.5843 | 241.1549 | 0.379643 | Positive | LZ |
| 305 | N,N-dimethyl-proline-proline betaine | M+H | 4.6856 | 272.1284 | 30.8406 | Positive | LZ、P |
| 306 | Higenamine | [M+H]+ | 5.931 | 183.0918 | 1.08341 | Positive | LZ、MZ、P |
| 307 | Harmane | M+H | 6.6474 | 198.1278 | 1.00119 | Positive | LZ、P |
| 308 | Dibenzylamine | M+H | 6.5716 | 181.0494 | 107.131 | Positive | LZ、MZ、P |
| 309 | allantoin | [M+Na]+ | 3.4288 | 174.0548 | 1.1396600000000001 | Positive | LZ、MZ、P |
| 310 | 4-QUINOLINECARBOXYLIC ACID | [M+H]+ | 18.292 | 609.2716 | 0.601063 | Positive | MZ |
| 311 | 3.10S-Hydroxypheophorbide a | M+H | 1.5811 | 180.1019 | 0.593061 | Positive | MZ |
| 312 | 1-METHYL-6,7-DIHYDROXY-1,2,3,4-TETRAHYDROISOQUINOLINE HYDROBROMIDE | [M+H]+ | 5.3645 | 307.1766 | 37.7539 | positive | LZ、P |
| 313 | (E)-N-(4-acetamidobutyl)-3-(4-hydroxy-3-methoxyphenyl)prop-2-enamide | M+H | 5.0082 | 475.252 | 2.05483 | positive | LZ、P |
| 314 | (E)-5-hydroxy-N-[3-[5-[3-[[(E)-5-hydroxy-3-methylpent-2-enoyl]amino]propyl]-3,6-dioxopiperazin-2-yl]propyl]-3-methylpent-2-enamide | [M+Na]+ | 1.2269 | 606.0751 | 1.8127 | Negative | LZ、P |

**Supplementary Table S2** Parameters of OPLS-DA Models

| OPLS-DA模型 | R2X(cum) | R2Y(cum) | Q2(cum) | P |
| --- | --- | --- | --- | --- |
| LZvsMZ | 0.506 | 0.986 | 0.855 | <0.05 |
| MZvsP | 0.461 | 0.913 | 0.747 | <0.05 |
| LZvsP | 0.433 | 0.892 | 0.767 | <0.05 |

**Supplementary Table S3** Metabolites are highly expressed in LZ in differentiated compounds

| Peak.NO | Metabolite | Formula | t/min | m/z | Ion | VIP | P | Log2FC |
| --- | --- | --- | --- | --- | --- | --- | --- | --- |
| 1 | feruloyltyramine | C18H19NO4 | 8.207 | 312.125 | - | 1.410173091 | 0.030286 | 1.3472 |
| 2 | 5-hydroxy-2-(4-hydroxyphenyl)-7-methoxy-2,3-dihydrochromen-4-one | C16H14O5 | 9.9532 | 287.0915 | + | 1.611899318 | 0.0032036 | 3.3252 |
| 3 | 2,3-bis[(4-hydroxy-3-methoxyphenyl)methyl]butane-1,4-diol | C20H26O6 | 7.6212 | 327.159 | + | 1.514166294 | 0.0045935 | 2.2723 |
| 4 | Isoliquiritigenin | C15H12O4 | 8.4325 | 257.0809 | + | 2.367660064 | 3.8708e-06 | 3.3777 |
| 5 | 6-desmethyl-sideroxylin | C17H14O5 | 7.2492 | 299.0912 | + | 1.125276831 | 0.045553 | 1.7712 |
| 6 | pinocembrin | C15H12O4 | 11.0244 | 255.067 | + | 1.46676154 | 0.017644 | 1.8832 |
| 7 | Secoisolariciresinol | C20H26O6 | 7.5956 | 361.1657 | + | 1.551993947 | 0.0082713 | 2.5785 |
| 8 | 7-Hydroxyflavanone | C15H12O3 | 10.4173 | 241.086 | + | 1.495287061 | 0.021995 | 3.4667 |
| 9 | linoleic acid | C18H32O2 | 13.9892 | 281.2476 | - | 1.306237976 | 0.023146 | 2.3516 |
| 10 | sucrose | C12H22O11 | 0.9011 | 365.1054 | + | 1.340580551 | 0.025171 | 1.492 |
| 11 | Palatinose | C12H22O11 | 0.9307 | 377.0859 | + | 1.561607303 | 0.010479 | 1.3565 |
| 12 | 9-Oxo-10E,12Z-octadecadienoic acid | C18H30O3 | 14.1639 | 295.2268 | + | 1.35722056 | 0.014902 | 1.1425 |
| 13 | alpha-Bisabolol | C15H26O | 14.3081 | 205.1951 | - | 1.582154673 | 0.0025926 | 2.0439 |
| 14 | 1-METHYL-6,7-DIHYDROXY-1,2,3,4-TETRAHYDROISOQUINOLINE HYDROBROMIDE | C10H13NO2 | 1.5811 | 180.1019 | - | 1.272354753 | 0.019719 | 3.9158 |
| 15 | 3-[(E)-2-(3-hydroxyphenyl)ethenyl]-5-methoxyphenol | C15H14O3 | 9.9526 | 241.0876 | + | 1.303198469 | 0.044295 | 1.1897 |
| 16 | SPHINGANINE | C18H39NO2 | 12.4513 | 302.3054 | + | 1.193287365 | 0.033655 | 3.1573 |
| 17 | 5-[6-(3-hydroxy-4-methoxyphenyl)-1,3,3a,4,6,6a-hexahydrofuro[3,4-c]furan-3-yl]-2-methoxyphenol | C20H22O6 | 9.13 | 341.1382 | + | 1.357043405 | 0.018021 | 1.6989 |
| 18 | Apigenin | C15H10O5 | 9.5332 | 271.0605 | - | 1.243648566 | 0.033104 | 2.0683 |
| 19 | Melibiose | C12H22O11 | 0.9553 | 387.1144 | + | 1.315831974 | 0.02809 | 1.9054 |
| 20 | 4-[(3R,3aR,6S,6aR)-6-(4-hydroxy-3,5-dimethoxyphenyl)-1,3,3a,4,6,6a-hexahydrofuro[3,4-c]furan-3-yl]-2,6-dimethoxyphenol | C22H26O8 | 8.8843 | 419.1691 | + | 1.462188486 | 0.010379 | 1.8161 |
| 21 | Paprazine | C17H17NO3 | 7.9615 | 284.128 | + | 1.299106707 | 0.022439 | 1.6543 |
| 22 | PC(0:0/18:1) | C26H53N1O7P1 | 14.0815 | 522.3538 | + | 1.547524816 | 0.0056763 | 1.5252 |
| 23 | Sinapyl alcohol | C11H14O4 | 10.2274 | 193.0859 | - | 1.628144516 | 0.0023268 | 3.232 |
| 24 | 12(13)-Epoxy-9Z-octadecenoic acid | C18H32O3 | 13.1853 | 243.2107 | - | 1.224170205 | 0.025178 | 3.0535 |
| 25 | Azelaic acid | C9H16O4 | 7.4431 | 187.0984 | - | 1.67578682 | 0.0028421 | 1.5405 |
| 26 | Sorbitol | C6H14O6 | 0.929 | 181.0724 | - | 1.342163563 | 0.030976 | 1.4885 |
| 27 | Pinoresinol | C20H22O6 | 9.1104 | 357.1343 | - | 1.94736239 | 0.0023303 | 1.7366 |
| 28 | Octadecanamide | [C18H37NO](https://pubchem.ncbi.nlm.nih.gov/" \l "query=C18H37NO) | 17.8716 | 284.2948 | + | 1.47512231 | 0.01072 | 1.1828 |
| 29 | 7-O-Methylchrysin | [C16H12O4](https://pubchem.ncbi.nlm.nih.gov/" \l "query=C16H12O4) | 9.485 | 269.0808 | + | 1.6880081 | 0.0013462 | 3.3018 |
| 30 | (E)-N-(4-acetamidobutyl)-3-(4-hydroxy-3-methoxyphenyl)prop-2-enamide | [C16H22N2O4](https://pubchem.ncbi.nlm.nih.gov/" \l "query=C16H22N2O4) | 5.3645 | 307.1766 | + | 1.477670076 | 0.0068697 | 3.8661 |
| 31 | 2-METHOXYCINNAMALDEHYDE | [C10H10O2](https://pubchem.ncbi.nlm.nih.gov/" \l "query=C10H10O2) | 10.7157 | 163.0752 | + | 1.802605038 | 0.00046829 | 3.0518 |
| 32 | Vanillic acid | [C8H8O4](https://pubchem.ncbi.nlm.nih.gov/" \l "query=C8H8O4) | 6.4059 | 167.0357 | - | 1.400447641 | 0.016567 | 1.4361 |
| 33 | Globulol | [C15H26O](https://pubchem.ncbi.nlm.nih.gov/" \l "query=C15H26O) | 14.5314 | 205.1951 | - | 1.463338596 | 0.0079646 | 2.0828 |
| 34 | N-Oleoylethanolamine | [C20H39NO2](https://pubchem.ncbi.nlm.nih.gov/" \l "query=C20H39NO2) | 15.98 | 326.3051 | + | 1.537245893 | 0.0043813 | 3.4423 |
| 35 | Syringaldehyde | C9H10O4 | 6.5799 | 183.0652 | + | 1.640870312 | 0.0020857 | 2.8531 |
| 36 | Phytoceramide C2 | [C20H41NO4](https://pubchem.ncbi.nlm.nih.gov/" \l "query=C20H41NO4) | 14.0142 | 360.3109 | + | 1.217779143 | 0.02789 | 2.617 |
| 37 | N,N-dimethyl-prolyl-proline | [C12H21N2O3+](https://pubchem.ncbi.nlm.nih.gov/" \l "query=C12H21N2O3+) | 1.5843 | 241.1549 | + | 1.360624343 | 0.014471 | 1.7886 |
| 38 | oleic acid | [C18H34O2](https://pubchem.ncbi.nlm.nih.gov/" \l "query=C18H34O2) | 17.8321 | 265.2526 | + | 1.871994856 | 0.00024965 | 1.9473 |
| 39 | 3,4,5-Trimethoxyphenol | [C9H12O4](https://pubchem.ncbi.nlm.nih.gov/" \l "query=C9H12O4) | 6.6202 | 185.0807 | + | 1.666638405 | 0.0011511 | 2.9548 |
| 40 | isolariciresinol | [C20H24O6](https://pubchem.ncbi.nlm.nih.gov/" \l "query=C20H24O6) | 6.9374 | 359.1501 | - | 1.824827529 | 0.0011053 | 4.544 |
| 41 | Glycerol 1-stearate | [C21H42O4](https://pubchem.ncbi.nlm.nih.gov/" \l "query=C21H42O4) | 18.3768 | 359.315 | + | 1.966767025 | 0.00014621 | 1.5911 |
| 42 | PC(19:1/0:0) | C27H55N1O7P1 | 14.7575 | 536.3695 | + | 1.32912867 | 0.020597 | 1.848 |
| 43 | 1-Naphthol | C10H8O | 8.8949 | 145.0645 | + | 1.26219809 | 0.021851 | 1.1844 |
| 44 | SYRINGIC ACID | [C9H10O5](https://pubchem.ncbi.nlm.nih.gov/" \l "query=C9H10O5) | 5.6498 | 199.0601 | + | 1.695788036 | 0.0011781 | 1.8405 |
| 45 | Citric acid | [C6H8O7](https://pubchem.ncbi.nlm.nih.gov/" \l "query=C6H8O7) | 0.9727 | 191.0204 | - | 1.214730142 | 0.042159 | 3.7327 |
| 46 | 3,3'-Dihydroxyflavone | [C15H12O4](https://pubchem.ncbi.nlm.nih.gov/" \l "query=C15H12O4) | 9.4576 | 253.0511 | - | 1.413078082 | 0.021504 | 1.6648 |
| 47 | 4-O-Methylphloracetophenone | [C9H10O4](https://pubchem.ncbi.nlm.nih.gov/" \l "query=C9H10O4) | 9.0967 | 181.051 | - | 1.29306674 | 0.046108 | 2.5106 |
| 48 | (2R,3S,4S,5R,6S)-2-[(3,4,5-trihydroxyoxan-2-yl)oxymethyl]-6-(3,4,5-trimethoxyphenoxy)oxane-3,4,5-triol | [C20H30O13](https://pubchem.ncbi.nlm.nih.gov/" \l "query=C20H30O13) | 5.1564 | 501.1569 | + | 1.166074266 | 0.049391 | 2.6576 |
| 49 | Monoolein | [C21H40O4](https://pubchem.ncbi.nlm.nih.gov/" \l "query=C21H40O4) | 16.9888 | 357.2995 | + | 1.416738023 | 0.0098289 | 1.9481 |
| 50 | 6,7-bis(hydroxymethyl)-1-methoxy-8-(3,4,5-trimethoxyphenyl)-5,6,7,8-tetrahydronaphthalene-2,3-diol | [C22H28O8](https://pubchem.ncbi.nlm.nih.gov/" \l "query=C22H28O8) | 6.5867 | 465.1761 | + | 1.276367125 | 0.022788 | 2.4498 |

**Supplementary Table S4** Metabolites are highly expressed in MZ in differentiated compounds

| Peak.NO. | Metabolite | Formula | t/min | m/z | Ion | VIP | P | Log2FC |
| --- | --- | --- | --- | --- | --- | --- | --- | --- |
| 1 | 1-({[2-(2-furylmethyl)-5-methylpyrrolidinyl]amino}methylene)-7-[8-({[2-(2-fury lmethyl)pyrrolidinyl]amino}methylene)-1,6-dihydroxy-3-methyl-5-(methylethyl)-7 -oxo(2-naphthyl)]-3,8-dihydroxy-6-methyl-4-(methylethyl)naphthalen-2-one | C49H56N4O8 | 12.2917 | 415.2107 | + | 1.29095819 | 0.0039256 | 5.0367 |
| 2 | 8-desmethyl-sideroxylin | [C17H14O5](https://pubchem.ncbi.nlm.nih.gov/" \l "query=C17H14O5) | 8.9981 | 299.0911 | + | 1.056834709 | 0.048888 | 6.8473 |
| 3 | ruscogenin | C27H42O4 | 15.079 | 431.3148 | + | 1.530253914 | 0.00056263 | 5.9455 |
| 4 | 4-methoxy-3-[(4-methoxyphenoxy)methyl]benzaldehyde | C16H16O4 | 10.8449 | 273.1121 | + | 1.395825745 | 0.0094855 | 1.0618 |
| 5 | Alpinetin | C16H14O4 | 9.7561 | 271.0965 | + | 1.067827932 | 0.023316 | 1.3883 |
| 6 | 12-Oxodihydrophytodienoic acid | [C18H30O3](https://pubchem.ncbi.nlm.nih.gov/" \l "query=C18H30O3) | 14.3892 | 277.2161 | + | 1.614065701 | 0.00029019 | 6.8927 |
| 7 | 4',5-Dihydroxy-7-methoxyflavanone | [C16H14O5](https://pubchem.ncbi.nlm.nih.gov/" \l "query=C16H14O5) | 10.3272 | 287.0917 | + | 1.280157246 | 0.025739 | 4.4288 |
| 8 | gamma-linolenic acid | C18H30O2 | 14.1013 | 279.2316 | + | 1.336299752 | 0.0047276 | 4.6871 |
| 9 | Apigeninidin | C15H10O4 | 6.9454 | 255.0651 | + | 1.294212323 | 0.010527 | 4.0354 |
| 10 | 3-O-Methylgalangin | C16H12O5 | 8.7741 | 285.0759 | + | 1.215001229 | 0.016159 | 4.8177 |
| 11 | Nonaethylene glycol | [C18H38O10](https://pubchem.ncbi.nlm.nih.gov/" \l "query=C18H38O10) | 5.8373 | 415.2535 | + | 1.287062074 | 0.010442 | 2.0452 |
| 12 | Chrysin | C15H10O4 | 8.8892 | 255.0652 | + | 1.492967665 | 0.011876 | 1.9798 |
| 13 | SINAPIC ACID | C11H12O5 | 7.8177 | 207.0652 | + | 1.276760279 | 0.0060281 | 3.1053 |
| 14 | Tangeretin | C20H20O7 | 11.9235 | 373.1274 | + | 1.035885969 | 0.034237 | 3.1153 |
| 15 | 4'-Hydroxy-7-methoxyflavone | C16H12O4 | 9.9405 | 269.0809 | + | 1.409000321 | 0.026405 | 3.3719 |
| 16 | Decaethylene glycol | C20H42O11 | 6.1728 | 459.2798 | + | 1.289696422 | 0.023206 | 1.7053 |
| 17 | Pinoresinol | [C20H22O6](https://pubchem.ncbi.nlm.nih.gov/" \l "query=C20H22O6) | 9.1104 | 357.1343 | - | 1.204833781 | 0.035622 | 1.2612 |
| 18 | 1-(9Z-Octadecenoyl)-sn-glycero-3-phosphocholine | C26H52NO7P | 14.1952 | 522.3535 | + | 1.559768997 | 0.00068976 | 3.2311 |
| 19 | Cyclopentasiloxane, decamethyl- | C10H30O5Si5 | 6.71 | 371.1047 | + | 1.022784722 | 0.039632 | 1.1834 |
| 20 | Umbelliferone | C9H6O3 | 5.8824 | 161.0252 | - | 2.081412632 | 0.00012694 | 4.2453 |
| 21 | 2,6-Di-tert-butyl-4-hydroxymethylphenol | C15H24O2 | 12.5264 | 219.1744 | + | 1.648474419 | 0.002219 | 1.0283 |
| 22 | 7,8-Dihydroxycoumarin | [C9H6O4](https://pubchem.ncbi.nlm.nih.gov/" \l "query=C9H6O4) | 5.3295 | 177.0199 | - | 1.372263171 | 0.023388 | 1.1152 |
| 23 | cholesta-5,7-dien-3beta-ol | C27H44O | 16.3387 | 385.3457 | + | 1.529439168 | 0.0019359 | 2.8365 |
| 24 | Cholesterol | C27H46O | 17.0586 | 369.3513 | + | 1.569361418 | 0.0047139 | 1.0527 |
| 25 | cis,cis-9,12-Octadecadien-1-ol | [C18H34O](https://pubchem.ncbi.nlm.nih.gov/" \l "query=C18H34O) | 14.5491 | 267.2684 | + | 1.022784722 | 0.039632 | 1.1834 |
| 26 | 3,3',4'-Trimethoxyflavone |  | 13.0218 | 313.1069 | + | 1.388897752 | 0.014629 | 2.4652 |
| 27 | 4,7-Methanoazulen-6(1H)-one, 2,4,5,7,8,8a-hexahydro-7-hydroxy-9-(hydroxymethyl)-1,4,9-trimethyl-, (1S,4R,7R,8aS)- |  | 8.4603 | 233.1539 | + | 1.074884888 | 0.049883 | 1.8166 |
| 28 | 2,6-DIMETHOXYBENZOIC ACID |  | 7.5446 | 183.0655 | + | 1.109051813 | 0.049856 | 1.7465 |
| 29 | Arenamide A |  | 14.3913 | 694.4133 | + | 1.038080341 | 0.048874 | 1.2073 |
| 30 | [3,4,5-trihydroxy-6-(hydroxymethyl)oxan-2-yl] 2,4-dihydroxy-6-[(E)-2-phenylethenyl]benzoate |  | 8.1656 | 419.1336 | + | 1.17857261 | 0.042272 | 1.6132 |
| 31 | 5,6,7,8-tetramethoxy-2-(4-methoxyphenyl)chromen-4-one [IIN-based: Match] |  | 11.624 | 373.1273 | + | 1.245093794 | 0.027915 | 1.4791 |
| 32 | 8-{(1S,5R)-4-Oxo-5-[(2Z)-2-penten-1-yl]-2-cyclopenten-1-yl}octanoic acid |  | 9.7783 | 275.2004 | + | 1.316669859 | 0.021207 | 1.4903 |
| 33 | Lactulose |  | 0.8285 | 325.1133 | + | 1.114683012 | 0.046956 | 1.1757 |
| 34 | HOMOVANILLIC ACID |  | 5.6211 | 183.0652 | + | 1.29047086 | 0.025349 | 2.9808 |
| 35 | Kaempferol-7-O-rhamnoside |  | 6.9095 | 433.1130 | + | 1.038080341 | 0.048874 | 1.2073 |
| 36 | 5-phenyl-1,3-oxazolidin-2-one |  | 6.6759 | 181.1010 | + | 1.508731511 | 0.0046728 | 1.0305 |
| 37 | Eupatorin |  | 10.994 | 345.0971 | + | 1.038080341 | 0.048874 | 1.2073 |
| 38 | Kaempferol-3-Rhamnoside-7-Rhamnoside |  | 6.9095 | 579.1690 | + | 1.038080341 | 0.048874 | 1.2073 |
| 39 | (+/-)-Taxifolin |  | 6.6721 | 305.0658 | + | 1.245093794 | 0.027915 | 1.4791 |
| 40 | PE(16:0/18:1) |  | 15.973 | 716.5253 | + | 1.616924153 | 0.010677 | 1.231 |
| 41 | 1-Heptadecanoyl-sn-glycero-3-phosphocholine |  | 14.2572 | 510.3536 | + | 1.038080341 | 0.048874 | 1.2073 |
| 42 | Stachyose |  | 0.8949 | 689.2088 | + | 1.114683012 | 0.046956 | 1.1757 |
| 43 | Riboflavin |  | 5.9887 | 377.1449 | + | 1.038080341 | 0.048874 | 1.2073 |
| 44 | 10S-Hydroxypheophorbide |  | 18.292 | 609.2716 | + | 2.3091 | 1.2073 | 0.048874 |
| 45 | Xefoampeptide E |  | 16.0577 | 524.4058 | + | 1.508731511 | 0.0046728 | 1.0305 |
| 46 | 3,4,5-TRIMETHOXYBENZALDEHYDE |  | 8.9193 | 197.0797 | + | 1.569361418 | 0.0047139 | 1.0527 |
| 47 | Adenosine |  | 1.7096 | 268.1046 | + | 1.508731511 | 0.0046728 | 1.0305 |

**Supplementary Table S5** Metabolites are highly expressed in P in differentiated compounds

| Peak.NO | Metabolite | Formula | t/min | m/z | Ion | VIP | P | Log2FC |
| --- | --- | --- | --- | --- | --- | --- | --- | --- |
| 1 | 4,7-Dihydroxyflavone | C15H10O4 | 7.938 | 255.0654 | + | 1.660122486 | 0.0017481 | 1.9222 |
| 2 | Moupinamide | C18H19NO4 | 8.2444 | 314.1388 | + | 1.32815706 | 0.011996 | 2.0372 |
| 3 | trans-pterostilbene | C16H16O3 | 11.5723 | 257.1172 | + | 2.538189577 | 0.00092356 | 2.7211 |
| 4 | 3-{2,4-dihydroxy-5-[3-(4-hydroxy-2-methoxyphenyl)-1-(4-hydroxyphenyl)propyl]phenyl}-1-(4-hydroxyphenyl)propan-1-one | C31H30O7 | 9.9199 | 497.195 | + | 1.687782488 | 0.040355 | 1.0876 |
| 5 | Biochanin | C16H12O5 | 7.5315 | 285.0759 | + | 1.695508575 | 0.043399 | 1.5727 |
| 6 | Isoliquiritigenin | C15H12O4 | 8.4325 | 257.0809 | + | 1.869921365 | 0.0091943 | 1.0816 |
| 7 | 2,4-Dimethoxy-2'-hydroxychalcone | [C17H16O4](https://pubchem.ncbi.nlm.nih.gov/" \l "query=C17H16O4) | 10.9987 | 285.1121 | + | 2.160805293 | 0.0016159 | 1.6339 |
| 8 | 9-Octadecenamide, (Z)- | C18H35NO | 16.5606 | 282.2793 | + | 1.540828595 | 0.0035184 | 1.5411 |
| 9 | 3-[(E)-2-(3-hydroxyphenyl)ethenyl]-5-methoxyphenol | C15H14O3 | 9.9526 | 241.0876 | - | 2.150987039 | 0.00027632 | 1.5397 |
| 10 | Eleutheroside E | C34H46O18 | 5.9986 | 765.2567 | + | 1.886015819 | 0.035581 | 2.0042 |
| 11 | 7-hydroxy-2-(4-hydroxyphenyl)-5-methoxy-2,3-dihydro-4h-chromen-4-one | C16H14O5 | 7.506 | 287.0914 | + | 1.448955132 | 0.0054853 | 1.4887 |
| 12 | sucrose | [C12H22O11](https://pubchem.ncbi.nlm.nih.gov/" \l "query=C12H22O11) | 0.9011 | 365.1054 | + | 1.300487983 | 0.037345 | 1.9887 |
| 13 | (S)-3-(4-hydroxyphenyl)chroman-7-ol | C15H14O3 | 9.9658 | 243.1016 | + | 1.419571623 | 0.00014362 | 1.7904 |
| 14 | 5-hydroxy-2-(4-hydroxyphenyl)-7-methoxy-2,3-dihydrochromen-4-one | C16H14O5 | 9.9532 | 287.0915 | + | 1.317862825 | 0.013817 | 2.4836 |
| 15 | Episyringaresinol 4'-O-beta-D-glncopyranoside | C28H36O13 | 7.0271 | 603.2036 | + | 1.538957111 | 0.0076988 | 1.7278 |
| 16 | linolenic acid | C18H30O2 | 13.7682 | 279.2319 | + | 1.066279888 | 0.045393 | 1.3398 |
| 17 | (E)-3-(3,4-dihydroxy-2-methoxyphenyl)-1-(4-hydroxyphenyl)prop-2-en-1-one | C16H14O5 | 8.4303 | 287.0913 | + | 1.585942691 | 0.029149 | 1.8831 |
| 18 | Paprazine | C17H17NO3 | 7.9615 | 284.128 | + | 1.953450503 | 0.037119 | 1.4413 |
| 19 | Palmitamide | C16H33NO | 16.1887 | 256.2635 | + | 1.458333831 | 0.002856 | 1.6056 |
| 20 | 2,3-bis[(4-hydroxy-3-methoxyphenyl)methyl]butane-1,4-diol | C20H26O6 | 7.6212 | 327.159 | + | 1.251365958 | 0.030044 | 1.2076 |
| 21 | 4-[(3R,3aR,6S,6aR)-6-(4-hydroxy-3,5-dimethoxyphenyl)-1,3,3a,4,6,6a-hexahydrofuro[3,4-c]furan-3-yl]-2,6-dimethoxyphenol | C22H26O8 | 8.8843 | 419.1691 | + | 1.884515006 | 0.00025291 | 2.2252 |
| 22 | 7-Hydroxyflavanone | C15H12O3 | 10.4173 | 241.086 | + | 1.408141506 | 0.018119 | 3.541 |
| 23 | Dibenzylamine | C14H15N | 6.6474 | 198.1278 | + | 1.627870857 | 0.015045 | 2.1131 |
| 24 | Coniferaldehyde | C10H10O3 | 7.4468 | 179.0701 | + | 1.289333554 | 0.022284 | 1.0707 |
| 25 | Genkwanin | C16H12O5 | 8.2323 | 285.0757 | + | 1.430061255 | 0.01006 | 1.8889 |
| 26 | linoleic acid | [C18H32O2](https://pubchem.ncbi.nlm.nih.gov/" \l "query=C18H32O2) | 13.9892 | 281.2476 | + | 1.190540899 | 0.024021 | 1.2247 |
| 27 | Octadecanamide | [C18H37NO](https://pubchem.ncbi.nlm.nih.gov/" \l "query=C18H37NO) | 17.8716 | 284.2948 | + | 1.436102289 | 0.0040845 | 1.1777 |
| 28 | Dibutyl phthalate | [C16H22O4](https://pubchem.ncbi.nlm.nih.gov/" \l "query=C16H22O4) | 14.4955 | 279.1592 | + | 1.36097556 | 0.0095602 | 1.4125 |
| 29 | Syringaldehyde | [C9H10O4](https://pubchem.ncbi.nlm.nih.gov/" \l "query=C9H10O4) | 6.5799 | 183.0652 | + | 1.835366373 | 0.00025519 | 2.3015 |
| 30 | 4',5-Dihydroxy-7-methoxyflavanone | [C16H14O5](https://pubchem.ncbi.nlm.nih.gov/" \l "query=C16H14O5) | 10.3272 | 287.0917 | + | 1.835366373 | 0.00025519 | 2.3015 |
| 31 | Pinocembrine | [C15H12O4](https://pubchem.ncbi.nlm.nih.gov/" \l "query=C15H12O4) | 11.0282 | 257.0809 | + | 1.226865412 | 0.010359 | 1.9585 |
| 32 | SPHINGANINE | [C18H39NO2](https://pubchem.ncbi.nlm.nih.gov/" \l "query=C18H39NO2) | 12.4513 | 302.3054 | + | 1.52518719 | 0.0077726 | 1.6532 |
| 33 | 7-O-Methylchrysin | [C16H12O4](https://pubchem.ncbi.nlm.nih.gov/" \l "query=C16H12O4) | 9.485 | 269.0808 | + | 1.242118786 | 0.020723 | 2.801 |
| 34 | Sinapoyl aldehyde | [C11H12O4](https://pubchem.ncbi.nlm.nih.gov/" \l "query=C11H12O4) | 7.4248 | 207.067 | - | 1.256989539 | 0.044912 | 1.1491 |
| 35 | 3,4,5-Trimethoxyphenol | [C9H12O4](https://pubchem.ncbi.nlm.nih.gov/" \l "query=C9H12O4) | 6.6202 | 185.0807 | + | 1.761411233 | 0.00054203 | 2.7981 |
| 36 | 2-METHOXYCINNAMALDEHYDE | [C10H10O2](https://pubchem.ncbi.nlm.nih.gov/" \l "query=C10H10O2) | 10.7157 | 163.0752 | + | 1.022551488 | 0.025546 | 2.6236 |
| 37 | 4-Allyl-2-(beta-D-glucopyranosyloxy)phenyl beta-D-glucopyranoside | [C21H30O12](https://pubchem.ncbi.nlm.nih.gov/" \l "query=C21H30O12) | 5.951 | 497.1621 | + | 1.201424639 | 0.046095 | 1.3519 |
| 38 | Glycerol 1-stearate | [C21H42O4](https://pubchem.ncbi.nlm.nih.gov/" \l "query=C21H42O4) | 18.3768 | 359.315 | + | 1.57413845 | 0.00059618 | 1.5415 |
| 39 | PC(19:1/0:0) | C27H55N1O7P1 | 14.7575 | 536.3695 | + | 1.439465561 | 0.0029691 | 1.8529 |
| 40 | (2S,3R,4S,5S,6R)-2-[4-[(3S,3aR,6S,6aR)-3-(4-hydroxy-3,5-dimethoxyphenyl)-1,3,3a,4,6,6a-hexahydrofuro[3,4-c]furan-6-yl]-2,6-dimethoxyphenoxy]-6-(hydroxymethyl)oxane-3,4,5-triol | [C28H36O13](https://pubchem.ncbi.nlm.nih.gov/" \l "query=C28H36O13) | 7.0101 | 598.2485 | + | 1.67502622 | 0.0037582 | 2.6455 |
| 41 | 1-Naphthol | [C10H8O](https://pubchem.ncbi.nlm.nih.gov/" \l "query=C10H8O) | 8.8949 | 145.0645 | + | 1.578403722 | 0.0027306 | 1.6388 |
| 42 | 1-METHYL-6,7-DIHYDROXY-1,2,3,4-TETRAHYDROISOQUINOLINE HYDROBROMIDE | [C10H14BrNO2](https://pubchem.ncbi.nlm.nih.gov/" \l "query=C10H14BrNO2) | 1.5811 | 180.1019 | + | 1.580845637 | 0.00483 | 1.4289 |
| 43 | N-Oleoylethanolamine | [C20H39NO2](https://pubchem.ncbi.nlm.nih.gov/" \l "query=C20H39NO2) | 15.98 | 326.3051 | + | 1.663579941 | 0.0030576 | 1.928 |
| 44 | 2-Phenylethyl 6-O-(6-deoxy-alpha-L-mannopyranosyl)-beta-D-glucopyranoside | [C20H30O10](https://pubchem.ncbi.nlm.nih.gov/" \l "query=C20H30O10) | 6.2839 | 448.2172 | + | 1.249590317 | 0.046163 | 1.6472 |
| 45 | 3',5'-Dimethoxy-4'-hydroxyacetophenone | [C10H12O4](https://pubchem.ncbi.nlm.nih.gov/" \l "query=C10H12O4) | 6.9214 | 197.0808 | + | 1.603867526 | 0.00050679 | 2.3871 |
| 46 | beta-D-Glucopyranoside, 2-hydroxy-4-(2-propen-1-yl)phenyl 6-O-beta-D-glucopyranosyl- | [C21H30O12](https://pubchem.ncbi.nlm.nih.gov/" \l "query=C21H30O12) | 1.5843 | 241.1549 | + | 1.386370503 | 0.017541 | 2.2671 |
| 47 | N,N-dimethyl-proline-proline betaine | C12H20N2O3 | 0.9295 | 539.1389 | + | 1.799560061 | 0.0021445 | 2.5815 |
| 48 | RAFFINOSE | [C18H32O16](https://pubchem.ncbi.nlm.nih.gov/" \l "query=C18H32O16) | 0.9295 | 539.1389 | + | 1.228083224 | 0.045543 | 1.1566 |
| 49 | MoNA:2735721 Ddze | [C15H10O4](https://pubchem.ncbi.nlm.nih.gov/" \l "query=C15H10O4) | 9.3296 | 253.0511 | - | 2.112887622 | 0.0043297 | 1.9163 |
| 50 | Chrysin | [C15H10O4](https://pubchem.ncbi.nlm.nih.gov/" \l "query=C15H10O4) | 8.8892 | 255.0652 | + | 2.218358935 | 0.0022053 | 2.6038 |
